## **Elicitation of potent serum neutralizing antibody responses in rabbits by immunization with an HIV-1 clade C trimeric Env derived from an Indian elite neutralizer**

Rajesh Kumar <sup>1§</sup>, Suprit Deshpande <sup>1§</sup>, Leigh M. Sewall <sup>2</sup>, Gabriel Ozorowski <sup>2</sup>, Christopher A. Cottrell <sup>2</sup>, Wen-Hsin Lee <sup>2</sup>, Lauren G. Holden <sup>2</sup>, Sara T. Richey <sup>2</sup>, Antra Singh Chandrawacar <sup>3,4</sup>, Kanika Dhiman <sup>3</sup>, Ashish <sup>3,4</sup>, Vivek Kumar <sup>1</sup>, Shubbir Ahmed, Nitin Hingankar <sup>1</sup>, Naresh Kumar, Kailapuri G Murugavel <sup>5</sup>, Aylur K Srikrishnan <sup>5</sup>, Devin Sok <sup>6</sup>, Andrew B. Ward <sup>2</sup>, Jayanta Bhattacharya <sup>1,7\*</sup>

1. Translational Health Science & Technology Institute, NCR Biotech Science Cluster, Faridabad, Haryana-121001, India
2. Department of Integrative Structural and Computational Biology, The Scripps Research Institute, La Jolla, CA 92037, USA; Scripps Consortium for HIV/AIDS Vaccine Development (CHAVD), The Scripps Research Institute, La Jolla, CA 92037, USA; IAVI Neutralizing Antibody Center and the Collaboration for AIDS Vaccine Discovery (CAVD), The Scripps Research Institute, La Jolla, CA 92037, USA.
3. CSIR-Institute of Microbial Technology (IMTECH), Chandigarh 160036
4. Academy of Scientific and Innovative Research (AcSIR), Ghaziabad 201002
5. Y. R. Gaitonde Centre for AIDS Research and Education, YRG CARE Laboratory, Rajiv Gandhi Salai, Adyar, Chennai-600113, Chennai, India, 600113;
6. IAVI Neutralizing Antibody Center, The Scripps Research Institute, La Jolla, CA 92037, USA; Department of Immunology and Microbiology, The Scripps Research Institute, La Jolla, CA 92037, USA; Consortium for HIV/AIDS Vaccine Development (CHAVD), The Scripps Research Institute, La Jolla, CA 92037, USA; International AIDS Vaccine Initiative (IAVI), New York, NY10004, USA.
7. International AIDS Vaccine Initiative, New Delhi - 110029, India; International AIDS Vaccine Initiative, New York, NY 10004, USA.

**Running title:** Structural and immunogenic properties of an HIV-1 clade C Env trimer

**Key words:** HIV-1, clade C, neutralizing antibodies, SOSIP, trimeric envelope, immunogenicity, elite neutralizer, electron microscopy

**Abstract word count:** 285

### **Competing interest:**

An Indian provisional patent application filed jointly by THSTI and IAVI on the sequence and partial applications of the 1PGE-THIVC (Indian HIV-1 clade C trimer); Provisional Patent Application No: 201911036660 with the following inventors: Dr. Jayanta Bhattacharya, Dr. Rajesh Kumar, Mr. Vivek Kumar, Dr. Suprit Deshpande, Dr. Murugavel Kailapuri Gangatharan.

§ equal contribution

\* **Corresponding author:**

E-mail: JBhattacharya@iavi.org; JBhattacharya@thsti.res.in

## Abstract

1  
2  
3           Evaluating the structure-function relationship of viral envelope (Env) evolution and the development  
4 of broadly cross-neutralizing antibodies (bnAbs) in natural infection can inform rational immunogen design.  
5 In the present study, we examined the magnitude and specificity of autologous neutralizing antibodies induced  
6 in rabbits by a novel HIV-1 clade C Env protein (1PGE-THIVC) *vis-à-vis* those developed in an elite neutralizer  
7 from whom the *env* sequence was obtained that was used to prepare the soluble Env protein. The thermostable  
8 1PGE-THIVC Env displayed a native like pre-fusion closed conformation in solution as determined by small  
9 angle X-ray scattering (SAXS) and negative stain electron microscopy (EM). This closed spike conformation  
10 of 1PGE-THIVC Env trimers was correlated with weak or undetectable binding of non-neutralizing monoclonal  
11 antibodies (mAbs) compared to neutralizing mAbs. Furthermore, 1PGE-THIVC SOSIP induced potent  
12 neutralizing antibodies in rabbits to autologous virus variants. The autologous neutralizing antibody specificity  
13 induced in rabbits by 1PGE-THIVC was mapped to the C3/V4 region (T362/P401) of viral Env. This  
14 observation agreed with electron microscopy polyclonal epitope mapping (EMPEM) of the Env trimer  
15 complexed with IgG Fab prepared from the immunized rabbit sera. While the specificity of antibodies elicited  
16 in rabbits associated with neutralizing autologous viruses were distinct to those developed in the elite  
17 neutralizer, EMPEM analysis demonstrated significant changes to Env conformations when incubated with  
18 polyclonal antibody sera from the elite neutralizer, suggesting these antibodies lead to the destabilization of  
19 Env trimers. Our study not only shows distinct mechanisms associated with potent neutralization of sequence  
20 matched and unmatched autologous viruses by antibodies induced in rabbits and in the elite neutralizer, but  
21 also highlights how neutralizing antibodies developed during the course of natural infection can impact viral  
22 Env conformations.

23

24 **Author Summary**

25

26 The interplay between circulating virus variants and broadly cross neutralizing polyclonal antibodies

27 developed in a subset of elite neutralizers is widely believed to provide strategies for rational immunogen

28 design. In the present study, we studied the structural, antigenic and immunogenic properties of a thermostable

29 soluble trimeric protein with near native pre-fusion conformation prepared using the primary sequence of an

30 HIV-1 clade C *env* isolated from the broadly cross neutralizing plasma of an elite neutralizer. This novel SOSIP

31 Env trimer demonstrated comparable antigenic, structural and immunogenic properties that favoured several

32 ongoing subunit vaccine design efforts. The novel clade C SOSIP induced polyclonal neutralizing antibody

33 response developed in rabbits not only differed in its epitope specificity compared to that elicited in natural

34 infection in presence of pool of viral quasispecies but also showed how they differ in their ability to influence

35 Env structure and conformation. A better understanding of how vaccine-induced polyclonal neutralizing

36 antibody responses compares to responses that developed in natural infection will improve our knowledge in

37 designing better vaccine design strategies.

38

39

40

41  
42  
43  
44  
45  
46  
47  
48  
49  
50  
51  
52  
53  
54  
55  
56  
57  
58  
59  
60  
61  
62  
63  
64  
65  
66

## Introduction

The elicitation of protective immune response by vaccination to protect against the enormous genetic diversity of HIV remains a challenge (1-5). Envelope (Env) spikes, which facilitate HIV entry and establish infection, are being considered as candidate immunogens because they mimic the trimer spike on virions (6-9). A number of recently published studies have demonstrated how structure guided stabilized Env trimers can induce potent neutralizing antibodies in different animal models (10-22). In addition, Env trimers have been used as antigen baits for the isolation bnAbs by B cell sorting and enabled structural characterization of antibody epitopes on Env (16, 23-27). Although in general, most of the trimeric Envs with closed conformation elicited of neutralizing antibodies to tier-1 and tier 2 sequence matched autologous viruses in different animal models, their target specificities varied subtly (14, 19, 28-31). As the quality and specificity of different Env trimer-induced neutralizing antibody responses varies, presumably because of difference in the *env* sequences used to prepare the trimeric Env proteins, there is value in producing additional recombinant HIV trimers from different clades, particularly those isolated from individuals who developed broadly neutralizing antibodies. We previously reported characterized genetic and neutralization properties of *env* sequences obtained from an Indian elite neutralizer (G37080) whose plasma antibodies demonstrated >90% neutralization breadth when tested against a large heterologous Env-pseudotyped virus panel (32).

In the present study, we examined the structural, antigenic and immunogenic properties of an HIV-1 trimeric Env SOSIP protein (referred to as 1PGE-THIVC) prepared using the sequence of one of the autologous *envs* (PG80v1.eJ19) obtained from an elite neutralizer. The autologous virus is sensitive to some existing bnAbs and plasma neutralizing antibodies developed in this individual as reported earlier, but not to non-neutralizing antibodies and sCD4 (32, 33). Our overall goal in this study was to compare differences in antibody responses between immunization with recombinant 1PGE-THIVC in rabbits and those that develop during natural infection course. Three of the four rabbits immunized with the highly stable, well-ordered near native 1PGE-THIVC with closed conformation and with desirable antigenicity elicited neutralizing antibodies that demonstrated potent neutralization of tier-2 autologous virus variants, including one highly resistant *env*

67 (PG80v2.eJ38) that was associated with escape from humoral antibody response mounted in the elite neutralizer  
68 (32, 33). Notably, neutralizing antibodies induced in rabbits by 1PGE-THIVC targeted discontinuous amino  
69 acids in the C3/T362 and V4/P401 regions on viral Env, which are distinct from those reported earlier for other  
70 Env SOSIPs. Epitopes at the C3/V4 region of HIV-1 Env targeted by SOSIP-induced neutralizing antibodies  
71 in rabbits and guinea pigs have also been previously reported (16, 34), however their antibody-specificity  
72 differed to what we have observed in this study. Moreover, we did not find (28, 29, 35) glycan holes associated  
73 with induction of SOSIP-induced neutralizing antibody response (34) in our study. The neutralizing antibody  
74 specificity developed in rabbits, however, was distinct to the kind elicited in the elite neutralizer from whom  
75 1PGE-THIVC primary sequence was obtained.

76

77

## Results

78

### 79 **Characterization of an HIV-1 clade C Env trimer obtained from an Indian elite neutralizer.**

80

81 We previously reported an Indian elite neutralizer (G37080) infected with HIV-1 clade C whose plasma  
82 antibodies demonstrated neutralization of over 90% of a cross-clade pseudotyped virus panel (32).  
83 Additionally, we reported the degree of susceptibility of pseudotyped viruses expressing primary *envs* obtained  
84 from G37080 donor to both autologous plasma antibodies as well as different neutralizing and non-neutralizing  
85 mAbs (32, 33). One of these autologous *envs*, PG80v1.eJ19, when expressed as pseudotyped virus was  
86 susceptible to a range of neutralizing antibodies but not to sCD4 or to non-neutralizing mAbs, including V3  
87 epitopes (3074 and 3896), b6, F105 and 17b (33). This Env was also resistant to PGT121, PGT128 and PGT135  
88 bnAbs presumably due to natural absence of N332 at the V3 base (33). Interestingly, in contrast to all other  
89 autologous Envs, PG80v1.eJ19 was the only variant that was naturally sensitive to PGT145 (33) and hence was  
90 selected for preparation as a recombinant SOSIP trimer (1PGE-THIVC). PGT145 exclusively binds to a  
91 conformational epitope on trimeric Env, thus providing advantages in purifying pure and near native soluble  
92 Env trimers via affinity chromatography (36). Codon optimized 1PGE-THIVC SOSIP was designed, expressed  
93 in 293F or Expi293 cells and trimeric fractions were purified by PGT145 affinity column followed by size  
94 exclusion chromatography (SEC) (Figure 1A & B). The 1PGE-THIVC SOSIP assembled as >95% well-  
95 ordered trimer populations by 2D negative stain EM (Figure 1D). While 1PGE-THIVC showed a single gp140  
96 band in SDS-PAGE (Figure 1C), the trimer converted into gp120 in the presence of DTT under reducing  
97 condition in SDS-PAGE (Figure 1E). One of the hallmarks of trimeric Envs that preferentially binds to  
98 neutralizing antibodies is that they tend to be efficiently cleaved compared to uncleaved or partially cleaved  
99 Envs, which generally expose non-neutralizing epitopes (13, 37-39). Our data indicated that the antigenicity of  
100 1PGE-THIVC was correlated with the soluble trimers being efficiently cleaved.

101 We next examined the conformational stability of the 1PGE-THIVC Env trimer. First, we assessed the  
102 antigenicity of 1PGE-THIVC Env by measuring binding to neutralizing and non-neutralizing mAbs by ELISA

103 (avidity). To facilitate binding with mAbs in trimeric state, D7324 epitope was introduced in the C- terminus  
104 in 1PGE-THIVC as described before (40). As shown in Figure 2A, 1PGE-THIVC preferentially bound to  
105 neutralizing mAbs over non-neutralizing mAbs. The binding affinity of 1PGE-THIVC to neutralizing and non-  
106 neutralizing mAbs with distinct specificities was next examined by BLI-Octet analysis (Figure 2B). For  
107 assessing binding affinity to bnAbs, we selected VRC01 and those that are dependent on quaternary  
108 conformation e.g., PG9, PGT145 and PGDM1400. VRC01, which targets the CD4bs, bound to 1PGE-THIVC  
109 with a very fast on-rate and very slow dissociation during wash and resulted an affinity of less than 1 nM (*KD*  
110 1.7 nM). 1PGE-THIVC also bound strongly to PGT145 and PGDM1400 with affinities (*KD*) of 14 nM and 29  
111 nM respectively (Figure 2B). Relative to PGT145 and PGDM1400, 1PGE-THIVC showed weak binding to  
112 PG9 bnAb, which also targets conformational epitopes including glycans in V1V2, with a *KD* of 41 nM (Figure  
113 2B). Interestingly, the increased binding of 1PGE-THIVC to both VRC01 and CD4-Ig was found to be  
114 dependent on Asn279 (not a PNGS) on viral Env and also showed evidence in our study to significantly reduce  
115 formation of sCD4-induced higher oligomer as observed in blue native PAGE (Figure 3). We noted that the  
116 highly conserved Asn276 (glycan) is also present in 1PGE-THIVC. As expected, and in line with what we  
117 observed in binding ELISA, 1PGE-THIVC did not bind to the non-neutralizing mAb F105. Taken together,  
118 these observation results suggested that the antigenic properties of the soluble PG80v1.eJ19 SOSIP.664 Env is  
119 consistent with those expected of a well-ordered native like Env trimers as the trimer binds to neutralizing  
120 bnAbs with high affinity and has limited binding to non-neutralizing antibodies.

121 We next examined the thermostability of the 1PGE-THIVC Env trimers by measuring the melting  
122 temperature (*T<sub>m</sub>*) using differential scanning calorimetry (DSC). As shown in Figure 4A, the *T<sub>m</sub>* for 1PGE-  
123 THIVC was observed to be approximately 62°C with an onset of melting at approximately 55°C. The high *T<sub>m</sub>*  
124 obtained for the 1PGE-THIVC was comparable with the double cysteine mutant reported stable Env trimers  
125 like BG505.SOSIP.664 (13) and LT5.J4b12C SOSIP.664 (40). The soluble 1PGE-THIVC was also found to  
126 demonstrate stability at 37°C as measured by its ability to bind to different bnAbs by D7324-ELISA (Figure  
127 4B). Overall, our data suggested that the soluble 1PGE-THIVC efficiently expresses highly stable well-ordered

128 trimers in a closed conformation, which predominantly occludes epitopes that are targets of non-neutralizing  
129 antibodies.

130

131 **Structural properties of the trimeric 1PGE-THIVC Env as determined by Small-angle X-ray scattering**  
132 **(SAXS) and homology modeling.**

133

134 The SAXS  $I(q)$  profile of 1PGE-THIVC at concentration of 0.85 mg/ml is presented in Figure 5. The data is  
135 shown in double logarithm mode and confirms a monodisperse sample profile that lacks any aggregation or  
136 interparticulate effects. Of all the acquired data points collected (black squares), the used data points are shown  
137 in blue color. Kratky plot of the dataset show a clear peak profile supporting a globular scattering profile of the  
138 protein molecules in solution (lower inset). Distribution of interatomic vectors show that the SOSIP molecules  
139 have a maximum linear dimension ( $D_{max}$ ) of about 15 nm with radius of gyration ( $R_g$ ) of 5.1 nm. The  
140 representative SAXS profile based on the estimation is shown as a red line in Figure 5A. The calculated SAXS  
141 data-based model of 1PGE-THIVC SOSIP molecule is shown in Figure 5B. The common envelope to all  
142 models is shown as map and the variation amongst ten models is shown as blue mesh. Normalized spatial  
143 disposition (NSD) amongst the ten models was 0.762 suggesting high similarity between the solutions. To  
144 compare this SAXS based model with previously determined structure of SOSIP, we used the primary structure  
145 of 1PGE-THIVC to generate a homology model of the protein (the closest template was PDB 6B0N) (shown  
146 as red, blue and green ribbons in Figure 5B). PDB 6B0N is crystal structure of prefusion state of HIV Env  
147 glycoprotein trimer of the clade A BG505 isolate in complex with Fabs of PGT122 and PGV19 (41). The sugar  
148 moieties of PDB 6B0N shown as magenta sticks were borrowed as such to represent glycosylation in 1PGE-  
149 THIVC. The homology model was inertially aligned over the SAXS based envelope. Three orthogonal views  
150 of the superimposition are shown in Figure 5B and 5C which provide visual confirmation that 1PGE-THIVC  
151 is also folded in P3 symmetry in same size/shape profile as previous models. Side-view shows that in the  
152 inertially aligned models, the SAXS data-based Env is not occupied in the bottom or gp41 side of the homology  
153 model (indicated by arrow). Using the SAXS and homology-based model, the different stretches of 1PGE-



154 THIVC SOSIP as determined by SAXS and homology-based model is shown in Figure S1 (supplementary  
155 data).

156

157 **1PGE-THIVC Env induced potent neutralizing antibodies against sequence matched and unmatched**  
158 **tier-2 autologous Envs.**

159

160 In line with the favorable antigenic properties demonstrated 1PGE-THIVC, which is expected of well-ordered  
161 Env trimers, we next examined its ability to induce neutralizing antibodies in rabbits. Four New Zealand female  
162 white rabbits were primed and boosted with 1PGE-THIVC trimers along with Quil-A adjuvant. Two rabbits  
163 were given PBS throughout the study as control group. Quil-A was selected as an adjuvant as it was reported  
164 to stimulate the antibody-mediated immune responses against range of antigens including viruses (42),  
165 modulates antibody fine-specificity (43) and does not alter the conformation when mixed with HIV-1 Env  
166 trimers (44). The prime-boost schedule used in the process of rabbit immunization is shown in Figure 6A.  
167 Rabbits were bled before initiation of immunization (day 0) and at week 2 post priming and at weeks, 6, 8 and  
168 12 post first boost and weeks 22, 24 and 28 following second boost with mixture of 30 µg of SOSIP protein  
169 and 40µg of Quil-A as indicated in Figure 6A. Serum samples prepared from blood samples collected at  
170 indicated intervals were heat-inactivated at 56°C for 1 hour to deactivate complement. Subsequently, the sera  
171 were evaluated for binding to 1PGE-THIVC by D7324 capture ELISA (Figure 6B) and neutralization of  
172 pseudotyped viruses expressing sequenced-matched autologous *envs* (PG80v1.eJ19 and PG80v1.eJ19 T332N)  
173 (Figure 6C & D) and two heterologous Tier 1 *envs* (SF162 and 93IN905). The peak binding of 1PGE-THIVC  
174 to serum antibodies was demonstrated by serum samples collected at week 10 and beyond from the immunized  
175 rabbits (Figure 6C). Serum samples from week 22 that demonstrated optimal binding to 1PGE-THIVC as  
176 demonstrated by D7324 ELISA was subsequently examined for its ability to neutralize sequence matched  
177 autologous Env-pseudotyped virus (PG80v1.eJ19). As shown Table 1, serum antibodies potentially neutralized  
178 pseudoviruses expressing both the sequence matched (PG80v1.eJ19 and PG80v1.eJ19 T332N) and sequence  
179 unmatched (PG80v1.eJ7, PG80v1.eJ17, PG80v1.eJ158 and PG80v2.eJ38) autologous *envs*. We observed

180 potent neutralization of PG80v2.eJ38, which was unexpected as this Env is not only resistant to autologous  
181 donor plasma antibodies (32) obtained from this elite neutralizer but also highly resistant (much like a tier-3  
182 Env) to several bnAbs (33). Such observation was not reported earlier with any SOSIP-induced neutralizing  
183 antibodies to the best of our knowledge. Additionally, although modest neutralization of heterologous Tier 1  
184 Env-pseudotyped viruses (SF162 and 93IN905) was observed, however with lower magnitude compared to  
185 autologous viruses (Figure 6E, F, H), which was possibly due to trimer falling apart thereby exposing the  
186 immunodominant epitopes in V3 region. Towards confirming the specificity of antibody-mediated virus  
187 neutralization, when tested, purified rabbit serum IgG was found to show neutralization of pseudoviruses  
188 expressing autologous *envs* in a dose-dependent manner (Figure 6H); thus, confirming the concordance of  
189 serum (Figure 6G) versus serum IgG mediated virus neutralization. Finally, potent autologous neutralization  
190 was correlated with efficient binding of serum IgG with 1PGE-THIVC SOSIP (Figure 6I). Taken together, our  
191 results indicated that 1PGE-THIC SOSIP trimers was able to induce antibodies in rabbits that demonstrated  
192 potent neutralization of pseudoviruses expressing sequence matched and unmatched tier-2 Envs and also  
193 demonstrated some degree of heterologous neutralization as well.

194  
195  
196 **Mapping target epitope specificities of neutralizing antibodies elicited in rabbits induced by 1PGE-**  
197 **THIVC.**

198  
199 We next examined the target specificity of the antibodies that demonstrated potent neutralization of autologous  
200 Env-pseudotyped viruses. Serum sample obtained at week-24 from rabbit #1 which demonstrated maximal and  
201 potent neutralization of autologous Envs was used to map epitope specificities using the pseudoviruses  
202 expressing wild type, chimeric and mutant autologous *env* constructs. Chimeric autologous envelope constructs  
203 were prepared between sensitive (PG80v1.eJ7 and PG80v1.eJ19) and this resistant autologous envelope  
204 (PG80v2.eJ38) as was done to assess specificities of human plasma antibodies too as shown above. As shown  
205 in Table 2, the resistant PG80v2.eJ38 Env-pseudotyped virus expressing V3/C4 sequence swapped from the  
206 sensitive PG80v1.eJ7 *env* was neutralized by serum antibodies in contrast to its wild type form, suggesting that

207 the antibodies induced in rabbits by 1PGE-THIVC mediated potent neutralization of autologous viruses by  
208 targeting epitopes in the V3/C4 region of the viral Env. To further map its fine specificities, we prepared and  
209 tested mutant *env* constructs in the PG80v2.eJ38 backbone. We found that substitutions of amino acids  
210 asparagine (glycan) with threonine at the 362 position (N362T) in the C3 and leucine to proline at the 401  
211 position (L401P) in the V4 regions resulted in over 8-fold increase in neutralization sensitivity (Table 2 and  
212 Figure S2) of the PG80v2.eJ38 Env-pseudotyped virus compared to its wild type form. Also, as shown in Table  
213 2, combination of T362N and P401L substitutions resulted in over 17 and 12- fold resistance of pseudotyped  
214 viruses expressing PG80v1.eJ7 and PG80v1.eJ19 *envs* respectively having similar C3/V4 protein sequence  
215 (Figure S2) compared to their wild type forms. Interestingly, while single substitutions of T362N and P401L  
216 in PG80v1.eJ19 *env* demonstrated reduction in virus neutralization by 5.28 and 6.26-fold respectively, the  
217 combination of both demonstrated a substantial reduction in virus neutralization as described above, indicating  
218 that T362 and P401 likely comprises an epitope in the C3/V4 region targeted by neutralizing antibodies induced  
219 in rabbits. Finally, as shown in Figure 7, compared to undepleted serum, we observed a significant reduction  
220 in the neutralization of pseudoviruses expressing autologous *envs* by 1PGE-THIVC trimer- depleted serum.  
221 Taken together, our results indicate that 1PGE-THIVC SOSIP developed using a primary *env* sequence  
222 amplified from an Indian elite neutralizer induced potent autologous neutralizing antibodies in rabbits having  
223 target epitope specificities to the C3/V4 epitope on trimeric Env, which is distinct to both autologous and  
224 heterologous broadly neutralizing antibodies developed in the elite neutralizer (Table S1).

225

#### 226 **Mapping polyclonal antibody specificities by ns-EMPEM analysis.**

227 The rabbit polyclonal serum antibody specificities developed over time following 1PGE-THIVC immunization  
228 were further examined by analyzing trimer-Fab complexes by EMPEM (45) (Figure 8). Trimer-specific  
229 responses were already observed at week 6 (2 weeks following the first boost), although against epitopes that  
230 are often seen in soluble Env immunizations and are considered non-neutralizing. These two responses are  
231 against the base of the trimer, which would not be inaccessible in a full-length native Env, and a region that  
232 coincides with the N611 glycan. Antibodies that target the N611 glycan have not been described, however

233 recent work reveals that this site is under-occupied (i.e. it contains the correct PNGS consensus sequence, but  
234 the asparagine is glycosylated to a varying degree) in certain recombinantly expressed, engineered Env trimers,  
235 creating a neoepitope that is not believed to exist on native Env (46). These two non-neutralizing responses  
236 persist in later timepoints. By week 12 (8 weeks following the first boost) a third response is detected in the  
237 vicinity of the C3/V5 epitope. This is in agreement (and presumably the same response) as the C3/V4 epitope  
238 described above. Antibodies against this epitope have been described and tend to be potent autologous  
239 neutralizers with limited cross-reactivity. Finally, at week 22 (2 weeks following the second boost) a fourth  
240 epitope is detected by EMPEM against the region comprised of V1/V3 and/or V2 (the resolution of negative  
241 stain EM cannot discern such subtleties). This response may share some overlap with bnAbs that target the V3-  
242 glycan epitope, although the lack of heterologous neutralization by the serum implies that these antibodies rely  
243 heavily on the variable regions of Env and are more strain specific.

244  
245 **Evidence of destabilization of SOSIP trimer conformation by autologous polyclonal antibodies elicited**  
246 **during natural infection course in the elite neutralizer (G37080).**

247  
248 We next examined the impact of polyclonal plasma antibodies on the conformational state of the 1PGE-THIVC  
249 trimers. Thus, as a comparison to the EMPEM analysis we carried out with rabbit serum as described above,  
250 we also analyzed the polyclonal IgG isolated from this chronically infected human elite neutralizer that  
251 demonstrated broad cross-clade neutralization (32). Digested Fab prepared from polyclonal plasma samples  
252 were used to prepare grids with the trimer-Fab complexes as monodisperse particles. As shown in Figure 9,  
253 contrary to the rabbit immunization experiment, in which a defined set of epitopes were observed against the  
254 trimer, the EM results for the human polyclonal plasma antibodies showed a high level of heterogeneity. 2D  
255 classification revealed heterogeneity in trimer-Fab complex, in which the majority of the classes appear to be  
256 Env protomers decorated with multiple Fabs or non-native open trimers. In fact, most of the 2D class averages  
257 reveal clusters of Fabs bound to fragments of Env, with no clear indication that intact trimers are part of these  
258 complexes. In the single 2D class containing an intact trimer, no Fabs are bound (Figure 9B). These data suggest

259 that the human donor developed antibodies that recognize multiple epitopes and were likely associated with  
260 destabilization of the engineered Env trimer ectodomain. The particles from the 2D classes do not reconstruct  
261 into an interpretable 3D density when provided a closed and ligand-free trimer as the initial model, which is  
262 likely a result of trimer dissociation (classes represent free protomers with several Fabs bound), trimer opening,  
263 or a combination of both. At least two broadly-neutralizing antibodies have been reported that induce trimer  
264 dissociation by targeting gp41, 3BC315 (derived from natural human infection) (47), and 1C2 (derived from  
265 rabbit immunization with engineered Env) (48). It has also been reported that antibodies directed against the  
266 CD4 binding site, V3 loop and the MPER can induce gp120 shedding (49). More recently, a study revealed  
267 that some V3 loop-targeting macaque antibodies can neutralize certain tier 2 viruses but require open  
268 conformations of Env with V3 exposed (50). While we are not able to assign specific epitopes from the EM  
269 data, it is clear that the responses during natural infection vary greatly compared to the rabbit immunization  
270 study.

271

## Discussion

272 While near-native soluble Env trimers have been described by other studies, it remains unclear how  
273 viral envelopes obtained from individuals who developed broadly cross neutralizing antibody responses in the  
274 course of natural infection can contribute to the elicitation of bnAbs by vaccination (19). The autologous  
275 neutralizing antibody response driving virus escape is an important step towards the initiation of a cascade of  
276 viral and B cell evolutionary events resulting in the development of potent and broad neutralizing antibodies in  
277 certain individuals. Investigating the quality, magnitude and specificity of the neutralizing antibody responses  
278 induced by geographically divergent *env* sequences obtained from elite neutralizers would likely provide key  
279 strategic clues in better formulating HIV immunogens for eliciting the desired vaccine-induced protective  
280 antibody responses. Attempts have been made to examine antigenic and immunogenic properties of Env trimers  
281 prepared from *env* sequences obtained from elite neutralizers (20, 60, 61). The near native 1PGE-THIVC  
282 SOSIP soluble trimeric gp140 protein prepared using the wild type (native) *env* sequence from the Indian elite  
283 neutralizer was found not only to express very efficiently but also demonstrated the elicitation of potent  
284 autologous tier-2 neutralizing antibodies in rabbits.

285 The rationale for selecting the clade C PG80v1.eJ19 sequence to prepare the 1PGE-THIVC SOSIP  
286 trimer is due to its sensitivity to neutralizing and resistance to all non-neutralizing antibodies tested including  
287 those that target coreceptor binding sites, sCD4 (33) and donor serum antibodies, which indicated that the viral  
288 envelope has favorable properties that might mimic the closed pre-fusion conformation. In the present study,  
289 we sought to examine how neutralizing antibodies induced in rabbits by 1PGE-THIVC representing  
290 PG80v1.eJ19 compare in their specificity, magnitude and quality with those elicited during the course of  
291 infection in this elite neutralizer.

292 Before initiating the rabbit immunization, we confirmed that the thermostable 1PGE-THIVC  
293 demonstrated favorable biophysical, biochemical, antigenic and structural properties. Without any additional  
294 modification, efficient expression of trimeric Envs was observed following PGT145 affinity purification and  
295 the trimer also showed closed near native conformation by low resolution negative stain EM analysis.  
296 Moreover, an Asn279Glu substitution was found to enhance binding of the trimer to VRC01 without promoting

297 CD4-induced conformational rearrangement that results in the open conformation of Env, which is known to  
298 expose unwanted immunodominant epitopes and induce non-neutralizing antibody response following  
299 immunization. It is intriguing that substitution of Asn279Glu, which is a part of the loop D, is very conserved  
300 ([www.hiv.lanl.gov](http://www.hiv.lanl.gov)) and also forms a contact site for CD4bs directed mAbs such as HJ16 and VRC01 (62-64),  
301 demonstrated enhanced binding of 1PGE-THIVC trimer to VRC01. Removal of Asn279 position (N279) was  
302 previously shown to demonstrate detrimental effect on recognition of VRC01 class antibodies (65). The 279  
303 position in the gp120 loop D is predominantly occupied by either Asn or Asp ([www.hiv.lanl.gov](http://www.hiv.lanl.gov)) and recently  
304 was reported by LaBranche *et al.* (64) that Asn279Lys along with Gly458Tyr mutations conferred  
305 transmitted/founder virus and Env protein with enhanced susceptibility to antibodies representing germline  
306 antibodies.

307 We also report on how the 1PGE-THIVC folds and breathes in solution under non-frozen conditions.  
308 One of the reasons why we were keen to examine how the SOSIP trimer 1PGE-THIVC behaves in solution  
309 was to predict the conformation expected *in vivo* in circulation post rabbit immunization. The SAXS data  
310 indicated that the 1PGE-THIVC SOSIP is folded in P3 or 3-fold symmetry however retains some degree of  
311 inherent molecular mobility/disorder which possibly could result in influencing recognition by neutralizing  
312 antibodies.

313 The 1PGE-THIVC immunized rabbit sera neutralized pseudoviruses expressing both sequence  
314 matched and unmatched autologous *envs*. These autologous envelopes obtained from the plasma sample of the  
315 elite neutralizer at the baseline visit, although sensitive to the follow up plasma neutralizing antibodies obtained  
316 from this donor (32), were resistant to non-neutralizing mAbs including those that target the V3  
317 immunodominant epitopes (such as 3074 and 3869) and the coreceptor binding site (e.g., 17b) (33).  
318 Interestingly, serum antibodies obtained from two immunized rabbits (rabbit # 1 and rabbit # 4) were found to  
319 show modest neutralization of the autologous PG80v2.eJ38 env that showed complete resistance to human  
320 plasma antibodies obtained in the follow up visit from the elite neutralizer (32) and to several neutralizing and  
321 non-neutralizing mAbs (33), a property that is expected of envelopes of Tier 2/3 category. Previously, we  
322 reported that PG80v2.eJ38 escaped plasma autologous plasma antibodies by mutations in V1V2 region (32);

323 however did not distinguish the different antibody classes circulating in this elite neutralizer. In the present  
324 study, we dissected the antibody class developed in this elite neutralizer by distinguishing their specificities by  
325 depletion assays and found that the class that demonstrated exclusive autologous neutralization also had V1V2  
326 specificity. These findings further confirmed our earlier observation of autologous virus escape by mutations  
327 in V1V2 region. In the present study, the immunized rabbit serum antibody specificity associated with  
328 neutralization of autologous viruses was mapped to C3/V4 specificity, which is distinct to the responses  
329 observed for human plasma neutralizing antibodies described above. Interestingly, although the N362 glycan  
330 residue present in the PG80v2.eJ38 *env* associated with some resistance to rabbit antibodies (and hence used  
331 for preparing chimeric *env* constructs for mapping antibody specificity), all were found to neutralize  
332 pseudovirus expressing PG80v2.eJ38 *env* except for the serum sample obtained from rabbit # 3. This  
333 observation is in sharp contrast to that observed with human plasma antibodies obtained from the elite  
334 neutralizer (32), which indicated that presence of proline residue at the 401 position in the C4 region possibly  
335 played a compensatory role that resulted in the neutralization of this tier 2/3 envelope. The 1PGE-THIVC  
336 induced antibodies in rabbits with C3/V4 specificity neutralized autologous virus (pseudotyped virus  
337 expressing PG80v2.eJ38) that was highly resistant to autologous human plasma antibodies as reported earlier  
338 (32), albeit with lower magnitude. Interestingly, the wild type PG80v1.eJ19 *env* lacks a glycan residue at the  
339 332 position (N332) in the V3 base, instead contain threonine (T332). While preparing 1PGE-THIVC, we  
340 incorporated T332N, however it did not appear to induce N332 directed antibodies, neither did it improve  
341 sensitivity of the PG80v1.eJ19 T332N envelope to rabbit sera over PG80v1.eJ19 T332 envelope. We are unable  
342 to comprehend the basis for resistance of PG80v1.eJ19 T332N envelopes to serum samples obtained at week  
343 22 from rabbit # 2 and 3 while the same sera neutralized pseudovirus expressing the PG80v1.eJ19 T332 *env*.

344 Despite production and *in vitro* characterization of well-ordered native like Env trimers, one of the  
345 concerns that remains post immunization is the stability and the ability of the Env trimers to retain its integrity  
346 *in vivo* as subtle distortion in conformation can lead to the induction of non-neutralizing antibodies via off-  
347 target binding. Loss in virus neutralization by trimer-depleted serum antibodies indicated that 1PGE-THIVC  
348 induced autologous neutralizing antibodies conformational epitopes. Indeed, serum antibodies obtained at week



349 22 from the rabbit that demonstrated the most potent neutralization also neutralized heterologous envelopes  
350 including those are categorized as Tier 1A. The magnitude of heterologous neutralization also differed; for  
351 example, SF162 and MW965 which are of Tier 1A category (66) showed maximal neutralization sensitivity  
352 compared to 93IN905 envelope which is of Tier 1B category (14). Intriguingly, this was not noticed with serum  
353 samples obtained from early time points post immunization. It is also important to note that the tier-2 clade A  
354 envelope, Q259.d2.17 was neutralized by the same serum antibodies at the same time. Therefore, it is unknown  
355 whether the neutralization of Tier 1 envelopes was exclusively mediated by non-neutralizing (such as those are  
356 directed to immunodominant V3 epitopes).

357 To further understand the quality of polyclonal antibodies developed in immunized rabbits, the  
358 polyclonal antibody imaging approach by negative stain EM analysis was carried out with serum samples  
359 collected at weeks 6 and 12 following first protein boost and at week 22 following second protein boost. The  
360 common feature of all these three serum samples is the presence of two non-neutralizing responses; gp41 base  
361 and a N611 glycan hole. The former is seen in majority of the soluble trimers that have been examined as this  
362 high peptide content base is highly immunogenic. The sub-occupancy of a glycan at position N611 has been  
363 demonstrated in BG505 SOSIP using mass spectrometry and cryo-EM (46). The N611 PNGS is highly  
364 conserved across clades ([www.hiv.lanl.gov](http://www.hiv.lanl.gov)) and both PG80v1.eJ19 and 1PGE-THIVC contain the consensus  
365 sequence for glycosylation at this position N611. While this is believed to be true for soluble SOSIP Env  
366 proteins, it is necessarily not true for primary viruses (67). Interestingly, in contrast to BG505 SOSIP, which  
367 demonstrated elicitation of strong 241/289 “glycan hole” directed antibody responses in rabbits (35), our data  
368 suggest that 1PGE-THIVC Env while this clade C *env* sequence naturally blocks those glycan epitopes.  
369 Additionally, rabbit sera also neutralized the pseudotyped virus expressing both parental PG80v1.eJ19 *env*  
370 having T332 and also its T332N version (Table 1), further indicating that neutralizing antibodies induced in  
371 rabbits also did not target N332 glycan epitope too. The serum samples collected at weeks 12 and 22  
372 demonstrated a C3/V5 directed antibody response, similar to previously published reports (34). This epitope is  
373 predicted to be dependent on glycan repositioning in the V5 loop, and since the V5 glycosylation site(s) vary  
374 across genotypes, cross-reactivity is likely to be hampered as described very recently (68). Finally, the serum

375 sample collected at week 22 following second SOSIP boost demonstrated a fourth antibody response by  
376 nsEMPEM analysis that indicated “V1/V3” and “V2-like” antibody responses, which at low resolution (2D  
377 classification) remains difficult to distinguish. However, it should be noted that neither responses appeared the  
378 same as that of canonical bnAb “V1/V2-apex” or “V3-glycan supersite.” We believe therefore that these  
379 antibodies will potentially have high levels of strain specificity as they interact with the V1, V2 and/or V3  
380 variable regions. Of note 1PGE-THIVC SOSIP trimers appear “more open” at the apex in the 3D  
381 reconstructions compared to BG505 SOSIP. What this means immunologically is hard to say since there do  
382 not appear to be responses to newly exposed epitopes, nor are epitopes of the four distinct antibodies responses  
383 measured against 1PGE-THIVC SOSIP known to induce opening. The V3 signal observed in nsEMPEM could  
384 partially explain neutralization of tier 1 envelopes, however, neither neutralization of tier 1 envelopes was  
385 observed with serum samples up to week 12 post SOSIP boost nor any elicitation of V3 directed antibody  
386 observed by polyclonal EMPEM analysis. Interestingly, in contrast to the specificities of neutralizing  
387 antibodies induced in rabbits as observed by EMPEM analysis, broadly cross neutralizing polyclonal antibodies  
388 developed in the human elite neutralizer drastically altered the trimer conformation of the sequence matched  
389 antigen that was used for rabbit immunization. While such observation has not been documented previously in  
390 the context of polyclonal antibody mapping, our observation indicates that a population of antibodies in the  
391 polyclonal mixture, possibly correlated to the broad neutralization developed in this elite neutralizer, are  
392 capable of destabilizing trimers, exposing additional epitopes that are normally buried surfaces (for example  
393 though gp120-induced shedding in natural infection) as shown in other unrelated studies (47, 49). This clearly  
394 suggests that the neutralizing antibody responses induced in rabbits by 1PGE-THIVC SOSIP trimer are  
395 different than those elicited during the course of natural infection in this individual. Although not known  
396 definitively, such phenomenon may possibly be linked with development of virus-antibody co-evolution  
397 leading towards achieving neutralization breadth. While in contrast to the rabbit antibodies, we could not infer  
398 human polyclonal antibody specificity by EMPEM, our data highlights how antibodies developed in  
399 natural infection that are tied neutralization breadth can significantly impact upon Env conformation. It would  
400 be important to further investigate the mechanism underlying this phenomenon by examining virus and

401 antibody interaction by following individuals infected with HIV overtime, particularly those who go on to  
402 develop cross neutralizing antibodies in the course of natural infection. In summary, it is important to study  
403 different well-ordered native SOSIPs in different animal models, which would better inform what structural,  
404 antigenic and immunogenic properties can better guide and select Env SOSIPs that would likely to help achieve  
405 neutralization breadth to genetically diversified HIV. Moreover, since subtype C accounts for nearly half of the  
406 global HIV infection ([www.hiv.lanl.gov](http://www.hiv.lanl.gov)), it is important to select and study region-specific HIV-1 Envs (e.g.,  
407 clade C) and which are associated with mounting neutralizing antibodies *in vivo* in the natural infection course.  
408 Such exercise will likely be able to inform the rational design and development of immunogens that can least  
409 be able to largely dissect the region-specific diversity of circulating HIV-1 subtypes such as clade C.

410

411

## Materials and Methods

412

### 413 **Ethics Statement.**

414 The blood samples were collected under the IAVI Protocol G study from slow-progressing ART naive HIV-1-  
415 positive donors from Nellore District of the state of Andhra Pradesh, southern India, by trained clinicians at the  
416 YRG Care Hospital following approval and clearance from the Institutional Review Board (IRB) and the Ethics  
417 Committee. The plasma samples collected were shipped to the Translational Health Science and Technology  
418 Institute, for research purpose only. The rabbit immunization work was outsourced to a contract research  
419 organization that obtained necessary approvals from animal ethics committee prior to conducting immunization  
420 and collecting blood samples from vaccinated rabbits.

421

### 422 **Preparation of 1PGE-THIVC SOSIP trimer.**

423 Codon optimized HIV-1 Indian clade C (1PGE-THIVC) gp140 SOSIP trimeric protein was prepared based on  
424 a Tier-2 HIV-1 clade C primary *env* sequence (PG80v1.eJ19), obtained from an Indian elite neutralizer (32)  
425 essentially as described by Sanders *et al.* (13). 1PGE-THIVC gene was codon-optimized by GeneArt (Thermo  
426 Fisher Inc.) and cloned into pcDNA3.1(+) with following modifications to the wild-type Env sequence: A501C,  
427 T605C, I559C (for trimer stabilization), and gp120 - gp41 cleavage motif REKR changed to RRRRRR. The  
428 D7324 epitope sequence (GSAPTKAKRRVQREKR) was added after residue 664 in gp41 ectodomain  
429 (ECTO) and preceding the stop codon to facilitate examining Env SOSIP binding by ELISA following  
430 published protocol (40, 51). 1PGE-THIVC was expressed by transient transfection of 293F or Expi293 cells,  
431 and the trimeric protein fraction was purified from culture supernatants first by using PGT145 mAb affinity  
432 column (36). Bound proteins were eluted with 3 M MgCl<sub>2</sub>, dialyzed with PBS pH (7.4), and subsequently  
433 concentrated using Amicon ultracentrifuge filters (Millipore) with a 100-kDa cutoff to 0.5-1 ml. The PGT145  
434 affinity purified SOSIP protein was further subjected to size exclusion chromatography (SEC) using a HiLoad  
435 Superdex 200 16/60 column (GE Healthcare Inc.). The SEC purified proteins were snap frozen in liquid  
436 nitrogen and stored at -80°C until further use. Purified trimeric SOSIP proteins were analyzed in a gradient 4-

437 15% BN-PAGE (Mini-PROTEAN TGXTM, Bio-Rad). The degree of 1PGE-THIVC cleavage was examined  
438 by incubating the SOSIP protein with 0.1 M dithiothreitol (DTT) and analyzed by SDS-PAGE under reducing  
439 conditions as described earlier (40).

440

#### 441 **Trimer ELISA**

442 Binding of SOSIP trimers to different mAbs by D7324 sandwich ELISA was carried out as described  
443 previously (40). Briefly, high-binding microtiter plates (Nunc, Inc.) were first coated with D7324 antibody  
444 (Aalto Bio Reagents, Dublin, Ireland) at 10 µg/ml (100 µl/well) in coating buffer (150 mM Na<sub>2</sub>CO<sub>3</sub>, 350 mM  
445 NaHCO<sub>3</sub>, 30 mM NaN<sub>3</sub>, pH 9.6) at 4°C overnight. Microtiter plates were washed three times using phosphate  
446 buffered saline (PBS) with 0.05% Tween-20 and subsequently blocked with 220 µl of 5% (w/v) nonfat milk in  
447 PBS and incubated at 37°C for 1 hour. Purified 1PGE-THIVC-D7324 trimers were added at 500 ng/ml in PBS  
448 (100 µl/well) for 2-3 hours. Unbound trimers were removed by washing three times with PBS. PBS containing  
449 3% (w/v) skimmed milk (250 µl/well) was subsequently added to block nonspecific protein-binding sites. The  
450 ELISA binding reactions were initiated by incubation of SOSIP protein to varying concentrations of mAbs for  
451 1 hour at 37°C. After three washes with PBS, 100 µl of anti-human HRP (Jackson ImmunoResearch  
452 Laboratories Inc.) diluted at 1:2000 was added and incubated at room temperature for 50 min. The plates were  
453 further washed four times with PBS containing Triton X-100 (0.05% v/v) and color developed by addition of  
454 100 µl of tetramethylbenzidine (TMB) substrate. Absorbance was measured at 450 nm in an ELISA reader  
455 (BioTek Inc.).

456

#### 457 **Biolayer Interferometry**

458 For binding kinetics anti-human Fc sensors (Octet, ForteBio Inc.) were used to capture the mAbs, whereas  
459 SOSIP trimer was used as analyte in varying concentrations (ranging from 210 to 2.6 nM) in the HEPES buffer  
460 background supplemented with 0.02% Tween 20 and 0.1% BSA (pH 7.2). The binding of antigen (SOSIP) and  
461 antibody (mAbs) were carried out in room temperature by incubation of SOSIP-bound biosensors in wells  
462 containing mAbs (10 µg/ml) for 120 s with agitation at 1000 rpm. Binding association was recorded for 150 s

463 followed by dissociation for 450 s. Data were analyzed using the ForteBio Data Analysis software, 9.0 (Forte-  
464 Bio Inc) and using a 1:1 binding model to fit the association and dissociation curves. A global fit was performed  
465 using all curves in which the concentration of SOSIP yielded a change in binding of at least 0.1 nm and a  
466 measurable dissociation.

467

#### 468 **Differential Scanning Calorimetry (DSC)**

469 SOSIP protein in PBS (pH 7.2) diluted to 0.1- 0.2 mg/ml was loaded onto a Micro-Cal VP-Capillary DSC  
470 instrument (Malvern, Inc.) and subjected to a 20 - 90 °C ramp at 60°/h. Origin 7.0 software was used to subtract  
471 baseline measurements and to fit the melting curves using a non-two-state model. Reported  $T_m$  values are for  
472 the tallest peak of each sample.

473

#### 474 **Negative stain EM**

475 1PGE-THIVC SOSIP trimers were diluted to 0.01-0.03 mg/ml, applied to a carbon coated Cu400 grid, and  
476 stained with 2% (w/v) uranyl formate as described previously (19). Data were collected on an FEI Tecnai Spirit  
477 T12 transmission electron microscope operating at 120 keV and equipped with a Tietz TVIPS CMOS camera.  
478 A magnification of 52,000x was used, resulting in a physical pixel size at the specimen plane of 2.05 Å. Data  
479 processing and analysis methods have been reported elsewhere (19). Two-dimensional classifications were  
480 performed using MSA/MRA (52).

481

#### 482 **Small Angle X-Ray Scattering (SAXS)**

483 All SAXS experiments described here have been performed on SAXSpace instrument (Anton Paar GmbH,  
484 Austria). The instrument had a sealed tube X-ray source, a line collimated X-ray beam and a 1D CMOS Mythen  
485 detector (Dectris, Switzerland). The wavelength of X-rays was 0.154 nm and the sample to detector distance  
486 was about 317.6 mm. SAXS data was acquired on three samples of SOSIP at concentrations of 0.72, 0.85 and  
487 1.1 mg/ml. For each concentration, the sample was exposed for 60 minutes (2 frames of 30 minutes each) at  
488 10°C in a thermostated quartz capillary with diameter of 1 mm. The scattering data captured at detection was  
489 re-calibrated for the beam position using SAXStreat software. The SAXSquant software was then used to

490 subtract buffer contribution, set the usable q-range, and desmear the data using the beam profile. The SAXS  
491 data was further analyzed using the programs available in the ATSAS 2.7 suite of programs (53). The radius  
492 of gyration ( $R_g$ ) was calculated on the basis of automated Guinier approximation using the PRIMUSQT  
493 integrated suite of programs (54). The Porod Exponent,  $x$  was estimated by plotting  $I(q) \cdot q^x$  vs  $q^x$  till the profile  
494 resembled hyperbolic profile. The molecular mass of the scattering particles/protein molecules was calculated  
495 using the DATMOW program. Same suite was used to compute the distance distribution function in auto-mode  
496 using the program GNOM which performs an Indirect Fourier transformation on the SAXS intensity profile  
497 (55). *Ab initio* models were generated using first computing ten independent models using DAMMIF program,  
498 superimposed and averaged using SUPCOMB and DAMAVER programs, and then the averaged structure was  
499 refined using DAMMIN program. Calculations of DAMMIF were done considering no (P1) or P3 symmetry.  
500 The SAXS based model of SOSIP e19 was compared with its PDB 6B0N based homology model by inertial  
501 axes alignment of two models using SUPCOMB program. For structural visualization and figure generation,  
502 open source Pymol and UCSF Chimera programs were used.

503

#### 504 **Preparation of Env-pseudotyped viruses.**

505 HIV-1 Env-pseudotyped viruses were prepared as described previously (32). Briefly, 293T cells were co-  
506 transfected with envelope-expressing plasmid and an *env*-deleted HIV-1 backbone plasmid (pSG3ΔEnv) using  
507 a FuGENE6 transfection kit (Promega Inc.). Cell supernatants containing pseudotyped viruses were harvested  
508 48 h post transfection and used for infection in TZM-bl cells using DEAE-dextran (25 μg/ml) in 96-well  
509 microtiter plates. The virus infectivity titers were determined by measuring the luciferase activity using Britelite  
510 luciferase substrate (PerkinElmer Inc.) in a luminometer (Victor X2, PerkinElmer Inc.).

511

#### 512 **Site-directed mutagenesis**

513 Point mutations by site-directed mutagenesis were introduced in *env* constructs using the QuikChange II kit  
514 (Agilent Technologies Inc.) following the manufacturer's protocol. Introduction of desired substitutions was  
515 confirmed by sequencing as described previously (32).

516  
517 **Neutralization assay**  
518 Neutralization assays were carried out using TZM-bl reporter cells as described before (56). Briefly, Env-  
519 pseudotyped viruses were incubated with varying dilutions of antibodies (mAbs, serum and plasma) for 1 h at  
520 37°C in a CO<sub>2</sub> incubator under humidified condition. TZM-bl cells (1 X 10<sup>4</sup>) were added into the mixture virus-  
521 antibody mixture containing 25 µg/ml DEAE-dextran (Sigma). The plates were further incubated for 48 h and  
522 the extent of virus neutralization was assessed by measuring relative luminescence units in a luminometer  
523 (Victor X2, PerkinElmer Life Sciences).

524  
525 **Rabbit immunization.**  
526 New Zealand white female rabbits were immunized with 30 µg of 1PE-THIVC SOSIP formulated with 40 µg  
527 Quil-A adjuvant (Invivogen Inc.) at weeks 0, 4 and 20. Four rabbits were taken in antigen immunized group  
528 and three rabbits were taken in placebo group. In placebo group, animals received PBS (pH 7.0). Pre-bled sera  
529 were obtained from all the rabbits prior to immunizations and bleed samples were collected from each animal  
530 at different time point as mentioned in Figure 6. Serum samples obtained post boost 2 were assessed for their  
531 extent to neutralize autologous and heterologous Env-pseudotyped viruses. The rabbit immunization was  
532 outsourced to a contract research organization (CRO) at Bengaluru, Karnataka, India.

533  
534 **Depletion of plasma and serum antibodies by monomeric gp120 and trimeric SOSIP proteins.**  
535 Purified soluble monomeric (92BR020 gp120) and trimeric 1PGE-THIVC (SOSIP gp140) proteins, in were  
536 used for the depletion of human plasma and rabbit serum neutralizing antibodies as described earlier (32).  
537 Briefly, purified gp120 and SOSIP proteins were covalently coupled to 30 mg of tosylactivated MyOne  
538 Dynabeads (Life Technologies Inc.) in coupling buffer [0.1 M NaBO<sub>4</sub>, 1M(NH<sub>4</sub>)<sub>2</sub>SO<sub>4</sub>; pH 9.4] overnight at  
539 37°C for 16 to 24 h according to the manufacturer's protocol. Env proteins bound to magnetic beads were  
540 separated from unbound proteins using a DynaMag 15 magnet (Life Technologies, Inc.). Env protein bound  
541 beads were further incubated with blocking buffer (PBS [pH 7.4], 0.1% bovine serum albumin [BSA; Sigma],



542 and 0.05% Tween 20) at 37°C to block the unbound sites and the antigenic integrity of Env proteins were  
543 assessed by examining their ability to bind to different mAbs by flow cytometry (FACSCanto; Becton and  
544 Dickinson, Inc.). For depletion studies, plasma and serum samples were diluted to 1:50 in Dulbecco's modified  
545 Eagle's medium (DMEM) containing 10% fetal bovine serum (FBS), and 500µl of diluted plasma or serum  
546 were incubated with 20µl of Env protein coupled magnetic beads at room temperature for 45 min. Unbound  
547 plasma and serum antibodies were separated from bound antibody fraction using a DynaMag 15 magnet as  
548 described above. This step was repeated 4 to 5 times for gp120 and 1-12 times for SOSIP protein (1PGE-  
549 THIVC) towards facilitating efficient depletion. As a negative control, G37080 plasma antibodies were  
550 depleted with uncoated beads in parallel. In addition to ELISA, the percent depletion of G37080 plasma. The  
551 degree of depletion of the polyclonal serum and plasma antibodies were assessed by ELISA and TZM-bl  
552 neutralization assay as described previously (32).

553

#### 554 **Polyclonal Fab preparation.**

555 Serum immunoglobulin G (IgG) was purified with a mixture of protein A/G affinity column. Purified IgG was  
556 digested for 6 hours at 37° C using 4% (w/w) liquid papain (Thermo Fischer Scientific) and digestion buffer  
557 (10 mM L-cysteine, 10X EDTA, pH 8). The digestion solution was collected, and Fab fragments were purified  
558 from undigested IgG and Fc-fragments using SEC (Superdex 200 Increase; GE Healthcare). Final Fab yields  
559 were ~0.75-1.5 mg. Complexes were assembled with 10-15 µ g of 1PGE-THIVC (SOSIP gp140) trimer and  
560 ~1 mg of purified polyclonal Fab, at room temperature for 18 hours. They were then purified using SEC  
561 (Superose 6 Increase; GE Healthcare) with TBS as a running buffer and concentrated with 10 kDa cutoff  
562 Amicon ultrafiltration units. Samples were diluted in TBS to ~30 µ g/ml and immediately deposited onto  
563 carbon-coated 400-mesh Cu grids (glow-discharged at 15 mA for 25 s), where they were then stained with 2%  
564 (w/v) uranyl formate for 30 s. For each sample, 116,958 to 250,000 individual particle images were collected  
565 and were subsequently submitted to 2D and 3D classification using Appion (57) and Relion 3.0 (58) data  
566 processing packages. Figures were generated using UCSF Chimera (59) by aligning representative 3D

567 reconstructions for a specific time point and animal to each other and segmenting the maps into Fab and trimer  
568 segments. For clarity, figures only display one Fab density per epitope and a single trimer density.

569

#### 570 **DATA AND SOFTWARE AVAILABILITY.**

571 EM volumes have been deposited to the Electron Microscopy Data Bank under accession codes EMD-  
572 22496, and EMD-22498 through EMD-22505 (inclusive) (<https://www.emdataresource.org/>).

573

#### 574 **Funding:**

575 This study was made possible by funding support from the United States Agency for International Development  
576 (USAID) through IAVI, the DBT National Bioscience Research Award [grant ID: BT/HRD/NBA34/01/2012-  
577 13(iv)], Department of Biotechnology (BT/PR24520/MED/29/1222/2017), Science & Engineering Research  
578 Board (CRG/2019/0029390), and partly by the Wellcome Trust-DBT India Alliance Team Science Grant  
579 (IA/TSG/19/1/600019) to JB; The EM work was supported by the IAVI Neutralizing Antibody Center through  
580 the Collaboration for AIDS Vaccine Discovery grants OPP1084519 (A.B.W.) and OPP1196345/INV-008813  
581 (A.B.W.) funded by the Bill and Melinda Gates Foundation. This work was also supported by the Collaboration  
582 for AIDS Vaccine Discovery grants OPP1115782 (A.B.W.) and INV-002916 (A.B.W.) funded by the Bill and  
583 Melinda Gates Foundation. The funders had no role in study design, data collection and interpretation, or the  
584 decision to submit the work for publication.

585

#### 586 **Acknowledgements:**

587 We thank the Protocol G study participant (G37080) registered with YRG Care, Chennai, all of the research  
588 staff members at the Protocol G clinical center at YRG Care, Chennai, and all of the IAVI Protocol G team  
589 members. We sincerely thank all our laboratory members for providing valuable input in preparing the  
590 manuscript. The 92BR020 wild type and mutant gp120 constructs as well as several bnAbs tested in this study  
591 were provided by the IAVI Neutralizing Antibody Center, the Scripps Research Institute, La Jolla, California,

592 USA. We also thank Prof David Montefiori for kindly providing us with the following *env* clones: Q23.17,  
593 CH038 and Q259.D22.2 used in this study. The following reagent was obtained through the NIH AIDS Reagent  
594 Program, Division of AIDS, NIAID, NIH, from John C. Kappes and Xiaoyun Wu: pSG3 *env*. IAVI's work  
595 was made possible by generous support from many donors, including the Bill & Melinda Gates Foundation,  
596 the Ministry of Foreign Affairs of Denmark, Irish Aid, the Ministry of Finance of Japan, the Ministry of Foreign  
597 Affairs of the Netherlands, the Norwegian Agency for Development Cooperation (NORAD), the United  
598 Kingdom Department for International Development (DFID), and the United States Agency for International  
599 Development (USAID). The full list of IAVI donors is available at [www.iavi.org](http://www.iavi.org). The contents are the  
600 responsibility of the International AIDS Vaccine Initiative and do not necessarily reflect the views of USAID  
601 or the United States Government. We thank Prof Gagandeep Kang, Dr Rajat Goyal and Prof Sudhanshu Vрати,  
602 for support.

603

604

605

606 **Author contribution:**

607

608 JB conceptualized the study; JB, RK, SD, GO, A, ABW designed the study; RK, VK designed the codon  
609 optimized SOSIP and examined biophysical and biochemical properties of the Env trimer and examined  
610 antigenic and immunogenic properties and thermostability; RK performed plasma depletion assays; RK, SD  
611 carried out neutralization assays; SD, NK prepared *env* mutant constructs and mapped neutralizing antibody  
612 specificities of rabbit and human serum samples; ASC, KD, A performed SAXS analysis of Env trimer; RK,  
613 NH prepared bulk volume of 1PGE-THIVC Env and purified serum IgG for EM structural studies at TSRI; LS,  
614 GO, CAC, WL, LGH, SR, ABW carried out EMPER analysis; SA assisted in BLI-Octet analysis; KGM, AKS  
615 identified and recruited the human elite neutralizer under IAVI Protocol G study; KGM prepared and provided  
616 the donor plasma and serum samples used in this study in addition to providing related clinical data; DS  
617 provided reagents for antibody mapping studies and helped in data analysis. JB wrote the manuscript with help  
618 from all the authors.

619

620 **Declaration of interest:**

621 A provisional patent application (201911036660) has been filed jointly by THSTI and IAVI.

## Table Legends

**Table 1.** Neutralization of sequence matched and unmatched autologous Env-pseudotyped viruses by serum antibodies obtained from 1PGE-THIVC immunized rabbits.

**Table 2.** Mapping fine specificity of rabbit serum antibodies associated with neutralization of autologous virus.

## Figure legends

**Figure 1.** Purification of 1PGE-THIVC SOSIP. 1PGE-THIVC SOSIP was purified by PGT145 antibody affinity (A) and size exclusion chromatography (SEC) (B) followed by examination through blue native gel electrophoresis (C). D. The SEC purified two-dimensional negative-stain EM class averages of 1PGE-THIVC SOSIP.664 trimers. E. Efficient cleavage of 1PGE-THIVC trimeric Env observed when run in SDS-PAGE under reducing condition.

**Figure 2.** Antigenic properties of 1PGE-THIVC. A. Binding of 1PGE-THIVC with neutralizing and non-neutralizing mAbs by ELISA. B. Binding kinetics of 1PGE-THIVC to neutralizing and non-neutralizing mAbs by biolayer interferometry (BLI) kinetic analysis.

**Figure 3.** A. Effect of N279E on binding of 1PGE-THIVC with VRC01 and CD4-IgG2 by D-7324 capture ELISA. B. Blue native PAGE of SOSIP trimer (wild type and N27E version) in presence of 6-fold molar excess of sCD4.

**Figure 4.** Stability of 1 PGE-THIVC SOSIP trimer. **A.** Differential scanning calorimetry (DSC) of the SOSIP trimer;  $C_p$ , specific heat capacity. **B.** Time course of binding of 1PGE-THIVC to bnAbs PG9, PGT145 and a non-neutralizing mAb 39F at 37°C.

**Figure 5. A.** SAXS profile of the SOSIP e19 protein at about 1 mg/ml is presented in double log mode (black symbols). The blue symbols indicate the  $q$  range used to model the  $P(r)$  curve for this protein (shown as upper inset), and the red line represents the estimated SAXS profile from the  $P(r)$  curve. Lower inset shows the Kratky plot of data (blue symbols) and modelled profile (red line). **B.** (Left column) Three rotated views of the solution shape of SOSIP e19 protein restored within shape constraints present in SAXS data are shown here. Average of ten models is shown as grey map and variation in the models is shown as black mesh map. (Middle column) Automated superimposition of the residue level model of SOSIP e19 generated using primary structure of same protein and model structure of PDB ID: 6B0N with sugar moieties, and the SAXS based model have been shown. The residue level model is shown in ribbon format with three chains are shown in blue, green and red, and sugar moieties have been shown as sticks. (Right column) The residue level models superimposed in central column are shown independently. Middle panel shows where the stem side or gp41 portion is present in the model. The red arrow highlights gap in the SAXS based model vs. residue level model near the stem or gp41 region possibly due to accessible flexibility in solution. Normalized spatial disposition (NSD) amongst ten models solved using SAXS data and  $\chi^2$  value between final averaged model vs. raw data are mentioned in bottom. **C.** Modeled structure of SOSIP e19 trimer using primary structure, SAXS data-based information and template of PDB ID: 6B0N is shown here. Three chains of gp120 are shown in red, green and blue colors. The  $C^\alpha$  traces are shown as ribbons, and surfaces are shown in transparent mode. The sugar moieties representing glycosylation are shown as magenta sticks. The black arrows aid in providing the rotations done in model to present the image.

**Figure 6.** Immunogenicity of 1PGE-THIV in rabbits. **A.** Schedule of prime, boost and bleed time points. The binding (**B**) and neutralization of sequence matched (with and without N332) autologous viruses (**C** and **D**) by sera collected from four rabbits at 1:20 dilutions collected at different time points following prime and boost. **E.** Dose-dependent neutralization of pseudotyped virus expressing sequenced matched *env* (PG80v1.eJ19) by sera collected at week 22 following second boost with 1PGE-THIVC. **F.** Neutralization of pseudoviruses expressing sequence matched (PG80v1.eJ19) and unmatched (PG80v2.eJ38) autologous *envs* and heterologous tier1 *envs* (SF162 and 93IN905) by purified serum IgG in a dose-dependent manner; **G.** Binding of purified serum IgG (week 22; rabbit#1) to 1PGE-THIVC SOSIP trimer by D-7324 sandwich ELISA.

**Figure 7.** Effect of depletion of rabbit sera with 1PGE-THIVC SOSIP trimer on neutralization of pseudoviruses expressing sequence matched and unmatched autologous *envs*. Serum samples obtained at week 22 from best responder (rabbit#1) was depleted by incubating with purified magnetic beads coated with 1PGE-THIVC trimeric Env. The depleted and undepleted serum was assessed for its ability to neutralize pseudoviruses expressing autologous *envs* by TZM-bl luciferase assay.

**Figure 8. Mapping rabbit polyclonal antibody specificities by ns-EMPEM analysis.** **A.** Select 2D class averages and **B.** 3D reconstructions of 1PGE-THIVC SOSIP in complex with polyclonal rabbit IgG Fab following 3 different immunization time points. For clarity, maps have been segmented into trimer (gray) and Fab (colored by epitope), and only one Fab per epitope is shown on each trimer.

**Figure 9. EMPEM analysis of polyclonal IgG obtained from human elite neutralizer G37080.** **(A)** Representative raw micrograph and **(B)** 2D class averages reveal a high level of heterogeneity with clusters of Fabs bound to fragments of Env, with no clear indication that intact trimers are part of these complexes. A single 2D class containing an intact trimer with no Fabs bound is circled in

orange. The remaining classes might represent trimer dissociation (classes represent free protomers with several Fabs bound), trimer opening, or a combination of both.

### Supporting documents

**Table S1.** Mapping specificities of the autologous and heterologous plasma neutralizing antibodies obtained from the Indian elite neutralizer.

**Figure S1.** Different epitopes and loops in the primary structure of 1PGE-THIVC SOSIP trimer are highlighted in these images. In parentheses, highlighted residues and their respective colors are mentioned. The black arrows aid in providing the rotations done in model to present the image.

**Figure S2.** Alignment of C3/V4 amino acid sequences of the autologous *envs* obtained from G37080 donor. Amino acid numbering is made based on HXbc2 sequence. Amino acid residues in C3 and V4 that form key epitopes targeted by neutralizing antibodies induced in rabbits are highlighted. The glycan residue at the 362 position is underscored.



## References:

1. Moore PL, Williamson C. 2016. Approaches to the induction of HIV broadly neutralizing antibodies. *Curr Opin HIV AIDS* 11:569-575.
2. Haynes BF. 2015. New approaches to HIV vaccine development. *Curr Opin Immunol* 35:39-47.
3. Gaschen B, Taylor J, Yusim K, Foley B, Gao F, Lang D, Novitsky V, Haynes B, Hahn BH, Bhattacharya T, Korber B. 2002. Diversity considerations in HIV-1 vaccine selection. *Science* 296:2354-60.
4. Korber B, Gnanakaran S. 2009. The implications of patterns in HIV diversity for neutralizing antibody induction and susceptibility. *Curr Opin HIV AIDS* 4:408-17.
5. Korber B, Hraber P, Wagh K, Hahn BH. 2017. Polyvalent vaccine approaches to combat HIV-1 diversity. *Immunol Rev* 275:230-244.
6. Burton DR, and D. C. Montefiori. 1997. The antibody response in HIV-1 infection. *AIDS* 11(Suppl. A):S87-S98.
7. Burton DR, Ahmed R, Barouch DH, Butera ST, Crotty S, Godzik A, Kaufmann DE, McElrath MJ, Nussenzweig MC, Pulendran B, Scanlan CN, Schief WR, Silvestri G, Streeck H, Walker BD, Walker LM, Ward AB, Wilson IA, Wyatt R. 2012. A Blueprint for HIV Vaccine Discovery. *Cell Host Microbe* 12:396-407.
8. Mascola JR, Montefiori DC. 2010. The role of antibodies in HIV vaccines. *Annu Rev Immunol* 28:413-44.
9. Mascola JR, Haynes BF. 2013. HIV-1 neutralizing antibodies: understanding nature's pathways. *Immunol Rev* 254:225-44.
10. Sanders RW, Moore JP. 2014. HIV: A stamp on the envelope. *Nature* 514:437-8.
11. Sanders RW, Moore JP. 2017. Native-like Env trimers as a platform for HIV-1 vaccine design. *Immunol Rev* 275:161-182.
12. Ward AB, Wilson IA. 2017. The HIV-1 envelope glycoprotein structure: nailing down a moving target. *Immunol Rev* 275:21-32.
13. Sanders RW, Derking R, Cupo A, Julien JP, Yasmeen A, de Val N, Kim HJ, Blattner C, de la Pena AT, Korzun J, Golabek M, de Los Reyes K, Ketas TJ, van Gils MJ, King CR, Wilson IA, Ward AB, Klasse PJ, Moore JP. 2013. A next-generation cleaved, soluble HIV-1 Env trimer, BG505 SOSIP.664 gp140, expresses multiple epitopes for broadly neutralizing but not non-neutralizing antibodies. *PLoS Pathog* 9:e1003618.
14. Sanders RW, van Gils MJ, Derking R, Sok D, Ketas TJ, Burger JA, Ozorowski G, Cupo A, Simonich C, Goo L, Arendt H, Kim HJ, Lee JH, Pugach P, Williams M, Debnath G, Moldt B, van Breemen MJ, Isik G, Medina-Ramirez M, Back JW, Koff WC, Julien JP, Rakasz EG, Seaman MS, Guttman M, Lee KK, Klasse PJ, LaBranche C, Schief WR, Wilson IA, Overbaugh J, Burton DR, Ward AB,

- Montefiori DC, Dean H, Moore JP. 2015. HIV-1 VACCINES. HIV-1 neutralizing antibodies induced by native-like envelope trimers. *Science* 349:aac4223.
15. Sok D, Le KM, Vadnais M, Saye-Francisco KL, Jardine JG, Torres JL, Berndsen ZT, Kong L, Stanfield R, Ruiz J, Ramos A, Liang CH, Chen PL, Criscitiello MF, Mwangi W, Wilson IA, Ward AB, Smider VV, Burton DR. 2017. Rapid elicitation of broadly neutralizing antibodies to HIV by immunization in cows. *Nature* 548:108-111.
  16. Lei L, Yang YR, Tran K, Wang Y, Chiang CI, Ozorowski G, Xiao Y, Ward AB, Wyatt RT, Li Y. 2019. The HIV-1 Envelope Glycoprotein C3/V4 Region Defines a Prevalent Neutralization Epitope following Immunization. *Cell Rep* 27:586-598 e6.
  17. Sliепен K, Han BW, Bontjer I, Mooij P, Garces F, Behrens AJ, Rantalainen K, Kumar S, Sarkar A, Brouwer PJM, Hua Y, Tolazzi M, Schermer E, Torres JL, Ozorowski G, van der Woude P, de la Pena AT, van Breemen MJ, Camacho-Sanchez JM, Burger JA, Medina-Ramirez M, Gonzalez N, Alcami J, LaBranche C, Scarlatti G, van Gils MJ, Crispin M, Montefiori DC, Ward AB, Koopman G, Moore JP, Shattock RJ, Bogers WM, Wilson IA, Sanders RW. 2019. Structure and immunogenicity of a stabilized HIV-1 envelope trimer based on a group-M consensus sequence. *Nat Commun* 10:2355.
  18. Sliепен K, Medina-Ramirez M, Yasmeen A, Moore JP, Klasse PJ, Sanders RW. 2015. Binding of inferred germline precursors of broadly neutralizing HIV-1 antibodies to native-like envelope trimers. *Virology* 486:116-20.
  19. de Taeye SW, Ozorowski G, Torrents de la Pena A, Guttman M, Julien JP, van den Kerkhof TL, Burger JA, Pritchard LK, Pugach P, Yasmeen A, Crampton J, Hu J, Bontjer I, Torres JL, Arendt H, DeStefano J, Koff WC, Schuitemaker H, Eggink D, Berkhout B, Dean H, LaBranche C, Crotty S, Crispin M, Montefiori DC, Klasse PJ, Lee KK, Moore JP, Wilson IA, Ward AB, Sanders RW. 2015. Immunogenicity of Stabilized HIV-1 Envelope Trimers with Reduced Exposure of Non-neutralizing Epitopes. *Cell* 163:1702-15.
  20. Torrents de la Pena A, Rantalainen K, Cottrell CA, Allen JD, van Gils MJ, Torres JL, Crispin M, Sanders RW, Ward AB. 2019. Similarities and differences between native HIV-1 envelope glycoprotein trimers and stabilized soluble trimer mimetics. *PLoS Pathog* 15:e1007920.
  21. Ringe RP, Pugach P, Cottrell CA, LaBranche CC, Seabright GE, Ketas TJ, Ozorowski G, Kumar S, Schorcht A, van Gils MJ, Crispin M, Montefiori DC, Wilson IA, Ward AB, Sanders RW, Klasse PJ, Moore JP. 2019. Closing and Opening Holes in the Glycan Shield of HIV-1 Envelope Glycoprotein SOSIP Trimers Can Redirect the Neutralizing Antibody Response to the Newly Unmasked Epitopes. *J Virol* 93.
  22. Julien JP, Lee JH, Ozorowski G, Hua Y, Torrents de la Pena A, de Taeye SW, Nieuwsma T, Cupo A, Yasmeen A, Golabek M, Pugach P, Klasse PJ, Moore JP, Sanders RW, Ward AB, Wilson IA. 2015. Design and structure of two HIV-1 clade C SOSIP.664 trimers that increase the arsenal of native-like Env immunogens. *Proc Natl Acad Sci U S A* 112:11947-52.
  23. Schoofs T, Barnes CO, Suh-Toma N, Golijanin J, Schommers P, Gruell H, West AP, Jr., Bach F, Lee YE, Nogueira L, Georgiev IS, Bailer RT, Czartoski J, Mascola JR, Seaman MS, McElrath MJ, Doria-Rose NA, Klein F, Nussenzweig MC, Bjorkman PJ. 2019. Broad and Potent Neutralizing Antibodies Recognize the Silent Face of the HIV Envelope. *Immunity* 50:1513-1529 e9.

24. van Gils MJ, van den Kerkhof TL, Ozorowski G, Cottrell CA, Sok D, Pauthner M, Pallesen J, de Val N, Yasmeen A, de Taeye SW, Schorcht A, Gumbs S, Johanna I, Saye-Francisco K, Liang CH, Landais E, Nie X, Pritchard LK, Crispin M, Kelsoe G, Wilson IA, Schuitemaker H, Klasse PJ, Moore JP, Burton DR, Ward AB, Sanders RW. 2016. An HIV-1 antibody from an elite neutralizer implicates the fusion peptide as a site of vulnerability. *Nat Microbiol* 2:16199.
25. Sok D, van Gils MJ, Pauthner M, Julien JP, Saye-Francisco KL, Hsueh J, Briney B, Lee JH, Le KM, Lee PS, Hua Y, Seaman MS, Moore JP, Ward AB, Wilson IA, Sanders RW, Burton DR. 2014. Recombinant HIV envelope trimer selects for quaternary-dependent antibodies targeting the trimer apex. *Proc Natl Acad Sci U S A* 111:17624-9.
26. Garces F, Lee JH, de Val N, Torrents de la Pena A, Kong L, Puchades C, Hua Y, Stanfield RL, Burton DR, Moore JP, Sanders RW, Ward AB, Wilson IA. 2015. Affinity Maturation of a Potent Family of HIV Antibodies Is Primarily Focused on Accommodating or Avoiding Glycans. *Immunity* 43:1053-63.
27. Julien JP, Sok D, Khayat R, Lee JH, Doores KJ, Walker LM, Ramos A, Diwanji DC, Pejchal R, Cupo A, Katpally U, Depetris RS, Stanfield RL, McBride R, Marozsan AJ, Paulson JC, Sanders RW, Moore JP, Burton DR, Pognard P, Ward AB, Wilson IA. 2013. Broadly neutralizing antibody PGT121 allosterically modulates CD4 binding via recognition of the HIV-1 gp120 V3 base and multiple surrounding glycans. *PLoS Pathog* 9:e1003342.
28. Pauthner M, Havenar-Daughton C, Sok D, Nkolola JP, Bastidas R, Boopathy AV, Carnathan DG, Chandrashekar A, Cirelli KM, Cottrell CA, Eroshkin AM, Guenaga J, Kaushik K, Kulp DW, Liu J, McCoy LE, Oom AL, Ozorowski G, Post KW, Sharma SK, Steichen JM, de Taeye SW, Tokatlian T, Torrents de la Pena A, Butera ST, LaBranche CC, Montefiori DC, Silvestri G, Wilson IA, Irvine DJ, Sanders RW, Schief WR, Ward AB, Wyatt RT, Barouch DH, Crotty S, Burton DR. 2017. Elicitation of Robust Tier 2 Neutralizing Antibody Responses in Nonhuman Primates by HIV Envelope Trimer Immunization Using Optimized Approaches. *Immunity* 46:1073-1088 e6.
29. Klasse PJ, LaBranche CC, Ketas TJ, Ozorowski G, Cupo A, Pugach P, Ringe RP, Golabek M, van Gils MJ, Guttman M, Lee KK, Wilson IA, Butera ST, Ward AB, Montefiori DC, Sanders RW, Moore JP. 2016. Sequential and Simultaneous Immunization of Rabbits with HIV-1 Envelope Glycoprotein SOSIP.664 Trimers from Clades A, B and C. *PLoS Pathog* 12:e1005864.
30. Torrents de la Pena A, Julien JP, de Taeye SW, Garces F, Guttman M, Ozorowski G, Pritchard LK, Behrens AJ, Go EP, Burger JA, Schermer EE, Sliепен K, Ketas TJ, Pugach P, Yasmeen A, Cottrell CA, Torres JL, Vavourakis CD, van Gils MJ, LaBranche C, Montefiori DC, Desaire H, Crispin M, Klasse PJ, Lee KK, Moore JP, Ward AB, Wilson IA, Sanders RW. 2017. Improving the Immunogenicity of Native-like HIV-1 Envelope Trimers by Hyperstabilization. *Cell Rep* 20:1805-1817.
31. Kulp DW, Steichen JM, Pauthner M, Hu X, Schiffner T, Liguori A, Cottrell CA, Havenar-Daughton C, Ozorowski G, Georgeson E, Kalyuzhniy O, Willis JR, Kubitz M, Adachi Y, Reiss SM, Shin M, de Val N, Ward AB, Crotty S, Burton DR, Schief WR. 2017. Structure-based design of native-like HIV-1 envelope trimers to silence non-neutralizing epitopes and eliminate CD4 binding. *Nat Commun* 8:1655.
32. Patil S, Kumar R, Deshpande S, Samal S, Shrivastava T, Boliar S, Bansal M, Chaudhary NK, Srikrishnan AK, Murugavel KG, Solomon S, Simek M, Koff WC, Goyal R, Chakrabarti BK, Bhattacharya J. 2016. Conformational Epitope-Specific Broadly Neutralizing Plasma Antibodies

- Obtained from an HIV-1 Clade C-Infected Elite Neutralizer Mediate Autologous Virus Escape through Mutations in the V1 Loop. *J Virol* 90:3446-57.
33. Deshpande S, Patil S, Kumar R, Shrivastava T, Srikrishnan AK, Murugavel KG, Koff WC, Chakrabarti BK, Bhattacharya J. 2016. Association of mutations in V3/C3 domain with enhanced sensitivity of HIV-1 clade C primary envelopes to autologous broadly neutralizing plasma antibodies. *Retrovirology* 13:41.
  34. Klasse PJ, Ketas TJ, Cottrell CA, Ozorowski G, Debnath G, Camara D, Francomano E, Pugach P, Ringe RP, LaBranche CC, van Gils MJ, Bricault CA, Barouch DH, Crotty S, Silvestri G, Kasturi S, Pulendran B, Wilson IA, Montefiori DC, Sanders RW, Ward AB, Moore JP. 2018. Epitopes for neutralizing antibodies induced by HIV-1 envelope glycoprotein BG505 SOSIP trimers in rabbits and macaques. *PLoS Pathog* 14:e1006913.
  35. McCoy LE, van Gils MJ, Ozorowski G, Messmer T, Briney B, Voss JE, Kulp DW, Macauley MS, Sok D, Pauthner M, Menis S, Cottrell CA, Torres JL, Hsueh J, Schief WR, Wilson IA, Ward AB, Sanders RW, Burton DR. 2016. Holes in the Glycan Shield of the Native HIV Envelope Are a Target of Trimer-Elicited Neutralizing Antibodies. *Cell Rep* 16:2327-38.
  36. Ringe RP, Ozorowski G, Yasmeen A, Cupo A, Cruz Portillo VM, Pugach P, Golabek M, Rantalainen K, Holden LG, Cottrell CA, Wilson IA, Sanders RW, Ward AB, Klasse PJ, Moore JP. 2017. Improving the Expression and Purification of Soluble, Recombinant Native-Like HIV-1 Envelope Glycoprotein Trimers by Targeted Sequence Changes. *J Virol* 91.
  37. Dey AK, David KB, Lu M, Moore JP. 2009. Biochemical and biophysical comparison of cleaved and uncleaved soluble, trimeric HIV-1 envelope glycoproteins. *Virology* 385:275-81.
  38. Pancera M, Wyatt R. 2005. Selective recognition of oligomeric HIV-1 primary isolate envelope glycoproteins by potent neutralizing ligands requires efficient precursor cleavage. *Virology* 332:145-56.
  39. Si Z, Phan N, Kiprilov E, Sodroski J. 2003. Effects of HIV type 1 envelope glycoprotein proteolytic processing on antigenicity. *AIDS Res Hum Retroviruses* 19:217-26.
  40. Kumar R, Ozorowski G, Kumar V, Holden LG, Shrivastava T, Patil S, Deshpande S, Ward AB, Bhattacharya J. 2017. Characterization of a stable HIV-1 B/C recombinant, soluble, and trimeric envelope glycoprotein (Env) highly resistant to CD4-induced conformational changes. *J Biol Chem* 292:15849-15858.
  41. Sarkar A, Bale S, Behrens AJ, Kumar S, Sharma SK, de Val N, Pallesen J, Irimia A, Diwanji DC, Stanfield RL, Ward AB, Crispin M, Wyatt RT, Wilson IA. 2018. Structure of a cleavage-independent HIV Env recapitulates the glycoprotein architecture of the native cleaved trimer. *Nat Commun* 9:1956.
  42. Sun HX, Xie Y, Ye YP. 2009. ISCOMs and ISCOMATRIX. *Vaccine* 27:4388-401.
  43. Ahmed FK, Clark BE, Burton DR, Pantophlet R. 2012. An engineered mutant of HIV-1 gp120 formulated with adjuvant Quil A promotes elicitation of antibody responses overlapping the CD4-binding site. *Vaccine* 30:922-30.

44. Ozorowski G, Cupo A, Golabek M, LoPiccolo M, Ketas TA, Cavallary M, Cottrell CA, Klasse PJ, Ward AB, Moore JP. 2018. Effects of Adjuvants on HIV-1 Envelope Glycoprotein SOSIP Trimers In Vitro. *J Virol* 92.
45. Bianchi M, Turner HL, Nogal B, Cottrell CA, Oyen D, Pauthner M, Bastidas R, Nedellec R, McCoy LE, Wilson IA, Burton DR, Ward AB, Hangartner L. 2018. Electron-Microscopy-Based Epitope Mapping Defines Specificities of Polyclonal Antibodies Elicited during HIV-1 BG505 Envelope Trimer Immunization. *Immunity* 49:288-300 e8.
46. Derking R, Allen JD, Cottrell CA, Sliepen K, Seabright GE, Lee W, Rantalainen K, Antanasijevic A, Copps J, Yasmeen A, Van der Woude P, de Taeye SW, van den Kerkhof TL, Klasse PJ, Ozorowski G, van Gils M, Moore JP, Ward AB, Crispin M, Sanders RW. 2020. Enhancing glycan occupancy of soluble HIV-1 envelope trimers to mimic the native viral spike. *bioRxiv preprint* <https://doi.org/10.1101/2020.07.02.184135>.
47. Lee JH, Leaman DP, Kim AS, Torrents de la Pena A, Sliepen K, Yasmeen A, Derking R, Ramos A, de Taeye SW, Ozorowski G, Klein F, Burton DR, Nussenzweig MC, Pognard P, Moore JP, Klasse PJ, Sanders RW, Zwick MB, Wilson IA, Ward AB. 2015. Antibodies to a conformational epitope on gp41 neutralize HIV-1 by destabilizing the Env spike. *Nat Commun* 6:8167.
48. Dubrovskaya V, Tran K, Ozorowski G, Guenaga J, Wilson R, Bale S, Cottrell CA, Turner HL, Seabright G, O'Dell S, Torres JL, Yang L, Feng Y, Leaman DP, Vazquez Bernat N, Liban T, Louder M, McKee K, Bailer RT, Movsesyan A, Doria-Rose NA, Pancera M, Karlsson Hedestam GB, Zwick MB, Crispin M, Mascola JR, Ward AB, Wyatt RT. 2019. Vaccination with Glycan-Modified HIV NFL Envelope Trimer-Liposomes Elicits Broadly Neutralizing Antibodies to Multiple Sites of Vulnerability. *Immunity* 51:915-929 e7.
49. Ruprecht CR, Krarup A, Reynell L, Mann AM, Brandenburg OF, Berlinger L, Abela IA, Regoes RR, Gunthard HF, Rusert P, Trkola A. 2011. MPER-specific antibodies induce gp120 shedding and irreversibly neutralize HIV-1. *J Exp Med* 208:439-54.
50. Han Q, Jones JA, Nicely NI, Reed RK, Shen X, Mansouri K, Louder M, Trama AM, Alam SM, Edwards RJ, Bonsignori M, Tomaras GD, Korber B, Montefiori DC, Mascola JR, Seaman MS, Haynes BF, Saunders KO. 2019. Difficult-to-neutralize global HIV-1 isolates are neutralized by antibodies targeting open envelope conformations. *Nat Commun* 10:2898.
51. Ringe RP, Sanders RW, Yasmeen A, Kim HJ, Lee JH, Cupo A, Korzun J, Derking R, van Montfort T, Julien JP, Wilson IA, Klasse PJ, Ward AB, Moore JP. 2013. Cleavage strongly influences whether soluble HIV-1 envelope glycoprotein trimers adopt a native-like conformation. *Proc Natl Acad Sci U S A* 110:18256-61.
52. Ogura T, Iwasaki K, Sato C. 2003. Topology representing network enables highly accurate classification of protein images taken by cryo electron-microscope without masking. *J Struct Biol* 143:185-200.
53. Petoukhov MV, Franke D, Shkumatov AV, Tria G, Kikhney AG, Gajda M, Gorba C, Mertens HDT, Konarev PV, Svergun DI. 2012. New developments in the ATSAS program package for small-angle scattering data analysis. *Journal of Applied Crystallography* 45:342-350.

54. Konarev PV, Volkov VV, Sokolova AV, Koch MHJ, Svergun DI. 2003. PRIMUS: a Windows PC-based system for small-angle scattering data analysis. *Journal of Applied Crystallography* 36:1277-1282.
55. Svergun DI. 1992. Determination of the Regularization Parameter in Indirect-Transform Methods Using Perceptual Criteria. *Journal of Applied Crystallography* 25:495-503.
56. Ringe R, Thakar M, Bhattacharya J. 2010. Variations in autologous neutralization and CD4 dependence of b12 resistant HIV-1 clade C env clones obtained at different time points from antiretroviral naive Indian patients with recent infection. *Retrovirology* 7:76.
57. Lander GC, Stagg SM, Voss NR, Cheng A, Fellmann D, Pulokas J, Yoshioka C, Irving C, Mulder A, Lau PW, Lyumkis D, Potter CS, Carragher B. 2009. Appion: an integrated, database-driven pipeline to facilitate EM image processing. *J Struct Biol* 166:95-102.
58. Zivanov J, Nakane T, Forsberg BO, Kimanius D, Hagen WJ, Lindahl E, Scheres SH. 2018. New tools for automated high-resolution cryo-EM structure determination in RELION-3. *Elife* 7.
59. Pettersen EF, Goddard TD, Huang CC, Couch GS, Greenblatt DM, Meng EC, Ferrin TE. 2004. UCSF Chimera--a visualization system for exploratory research and analysis. *J Comput Chem* 25:1605-12.
60. Mesa KA, Yu B, Wrin T, Petropoulos CJ, Pogson GH, Alexander DL, Perez G, O'Rourke SM, Sinangil F, Robinson J, Conant MA, Berman PW. 2019. Ancestral sequences from an elite neutralizer proximal to the development of neutralization resistance as a potential source of HIV vaccine immunogens. *PLoS One* 14:e0213409.
61. Carbonetti S, Oliver BG, Glenn J, Stamatatos L, Sather DN. 2014. Soluble HIV-1 envelope immunogens derived from an elite neutralizer elicit cross-reactive V1V2 antibodies and low potency neutralizing antibodies. *PLoS One* 9:e86905.
62. Wibmer CK, Bhiman JN, Gray ES, Tumba N, Abdool Karim SS, Williamson C, Morris L, Moore PL. 2013. Viral escape from HIV-1 neutralizing antibodies drives increased plasma neutralization breadth through sequential recognition of multiple epitopes and immunotypes. *PLoS Pathog* 9:e1003738.
63. Schommers P, Gruell H, Abernathy ME, Tran MK, Dingens AS, Gristick HB, Barnes CO, Schoofs T, Schlotz M, Vanshylla K, Kreer C, Weiland D, Holtick U, Scheid C, Valter MM, van Gils MJ, Sanders RW, Vehreschild JJ, Cornely OA, Lehmann C, Fatkenheuer G, Seaman MS, Bloom JD, Bjorkman PJ, Klein F. 2020. Restriction of HIV-1 Escape by a Highly Broad and Potent Neutralizing Antibody. *Cell* 180:471-489 e22.
64. LaBranche CC, Henderson R, Hsu A, Behrens S, Chen X, Zhou T, Wiehe K, Saunders KO, Alam SM, Bonsignori M, Borgnia MJ, Sattentau QJ, Eaton A, Greene K, Gao H, Liao HX, Williams WB, Peacock J, Tang H, Perez LG, Edwards RJ, Kepler TB, Korber BT, Kwong PD, Mascola JR, Acharya P, Haynes BF, Montefiori DC. 2019. Neutralization-guided design of HIV-1 envelope trimers with high affinity for the unmutated common ancestor of CH235 lineage CD4bs broadly neutralizing antibodies. *PLoS Pathog* 15:e1008026.

65. Lynch RM, Wong P, Tran L, O'Dell S, Nason MC, Li Y, Wu X, Mascola JR. 2015. HIV-1 fitness cost associated with escape from the VRC01 class of CD4 binding site neutralizing antibodies. *J Virol* 89:4201-13.
66. Seaman MS, Janes H, Hawkins N, Grandpre LE, Devoy C, Giri A, Coffey RT, Harris L, Wood B, Daniels MG, Bhattacharya T, Lapedes A, Polonis VR, McCutchan FE, Gilbert PB, Self SG, Korber BT, Montefiori DC, Mascola JR. 2010. Tiered categorization of a diverse panel of HIV-1 Env pseudoviruses for assessment of neutralizing antibodies. *J Virol* 84:1439-52.
67. Cao L, Pauthner M, Andrabi R, Rantalainen K, Berndsen Z, Diedrich JK, Menis S, Sok D, Bastidas R, Park SR, Delahunty CM, He L, Guenaga J, Wyatt RT, Schief WR, Ward AB, Yates JR, 3rd, Burton DR, Paulson JC. 2018. Differential processing of HIV envelope glycans on the virus and soluble recombinant trimer. *Nat Commun* 9:3693.
68. Nogal B, Bianchi M, Cottrell CA, Kirchdoerfer RN, Sewall LM, Turner HL, Zhao F, Sok D, Burton DR, Hangartner L, Ward AB. 2020. Mapping Polyclonal Antibody Responses in Non-human Primates Vaccinated with HIV Env Trimer Subunit Vaccines. *Cell Rep* 30:3755-3765 e7.

**Table 1.** Neutralization of sequence matched and unmatched autologous Env-pseudotyped viruses by serum antibodies obtained from 1PGE-THIVC immunized rabbits.

| Env-pseudotyped viruses | Neutralization titer (ID50 values) |            |            |            |
|-------------------------|------------------------------------|------------|------------|------------|
|                         | Rabbit # 1                         | Rabbit # 2 | Rabbit # 3 | Rabbit # 4 |
| PG80v1.eJ19 WT          | 2284                               | 431        | 104        | 342        |
| PG80v1.eJ19 T332N       | 1081                               | 245        | <20        | <20        |
| PG80v1.eJ17             | 1505                               | 194        | 21         | 169        |
| PG80v1.eJ158            | 1123                               | 178        | 20         | 103        |
| PG80v1.eJ7              | 1037                               | 141        | 20         | 161        |
| PG80v2.eJ38             | 61                                 | 26         | <20        | 234        |

ID50 values are reciprocal dilutions that conferred 50% neutralization of Env-pseudotyped viruses in TZM-bl cell neutralization assay.



**Table 2.** Mapping fine specificity of rabbit serum antibodies associated with neutralization of autologous virus.

| Env constructs                | ID <sub>50</sub> values | Fold change in neutralization of Env-pseudotyped viruses |               |
|-------------------------------|-------------------------|----------------------------------------------------------|---------------|
|                               |                         | Fold increase                                            | Fold decrease |
| PG80v1.eJ7 wild type          | 1798.6                  | -                                                        | -             |
| PG80v1.eJ19 wild type         | 2117                    | -                                                        | -             |
| PG80v2.eJ38 wild type         | 97.58                   | -                                                        | -             |
| PG80v2.eJ38 (V1/V2 of v1.eJ7) | <20                     | No change                                                | No change     |
| PG80v2.eJ38 (V3/C3 of v1.eJ7) | <20                     | No change                                                | No change     |
| PG80v2.eJ38 (V3/C4 of v1.eJ7) | 664.18                  | 6.8                                                      | -             |
| PG80v2.eJ38 (C4/C5 of v1.eJ7) | 53.47                   | No change                                                | -             |
| PG80v2.eJ38 (K360R)           | 102.28                  | 1.05                                                     | -             |
| PG80v2.eJ38 (L401P)           | 418.46                  | 4.3                                                      | -             |
| PG80v2.eJ38 (N362T+K360R)     | 181                     | 1.85                                                     | -             |
| PG80v2.eJ38 (N362T+L401P)     | 789.68                  | 8.1                                                      | -             |
| PG80v1.eJ7 (T362N+P401L)      | 101.54                  | -                                                        | 17            |
| PG80v1.eJ19 (T362N+P401L)     | 171                     | -                                                        | 12.4          |
| PG80v1.eJ19 (T362N)           | 400.72                  | -                                                        | 5.28          |
| PG80v1.eJ19 (P401L)           | 337.96                  | -                                                        | 6.26          |

*ID<sub>50</sub> values refer to reciprocal dilution that conferred 50% neutralization of Env-pseudotyped viruses in TM-bl cells.*

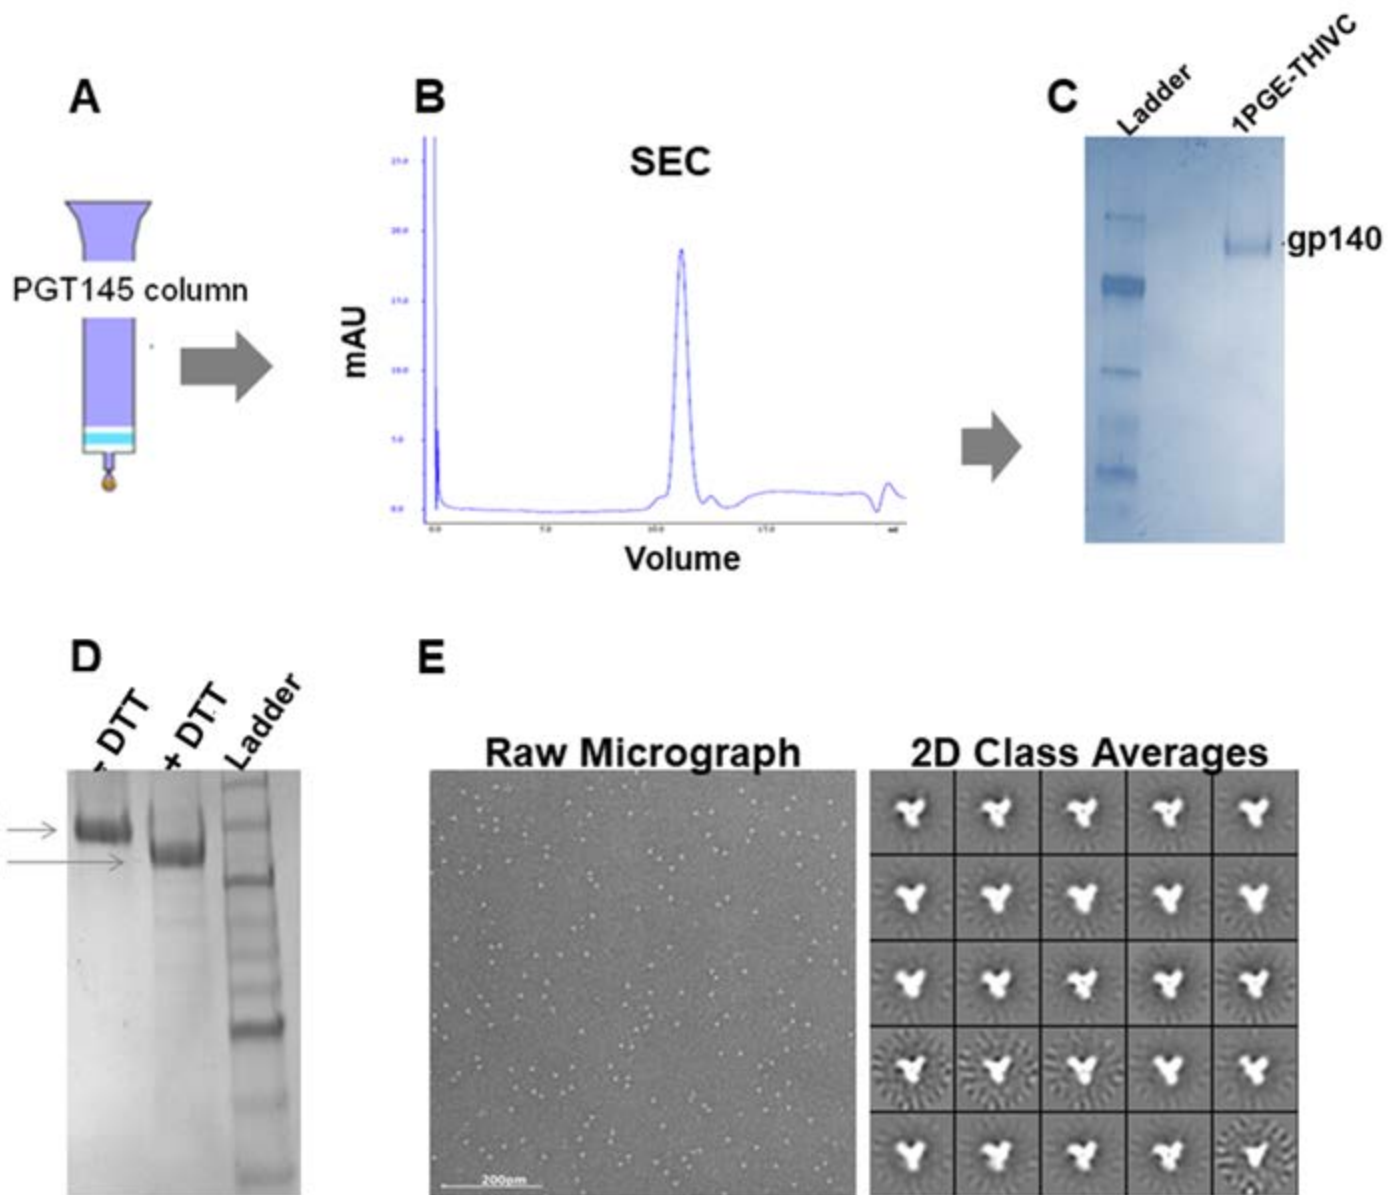

Figure 1

**A**

HVTR-PG80v1.eJ19 SOSIP.664

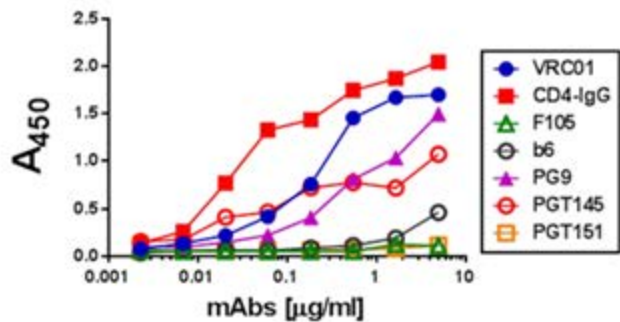

HVTR-PG80v1.eJ19 SOSIP.664

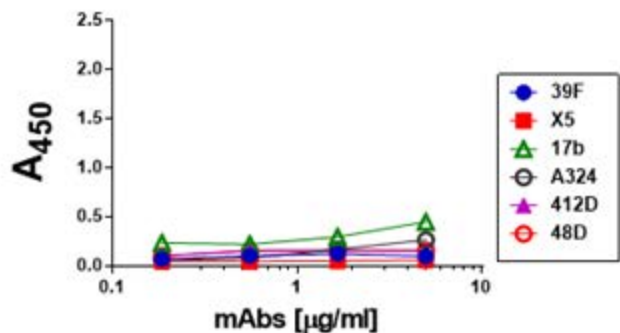**B**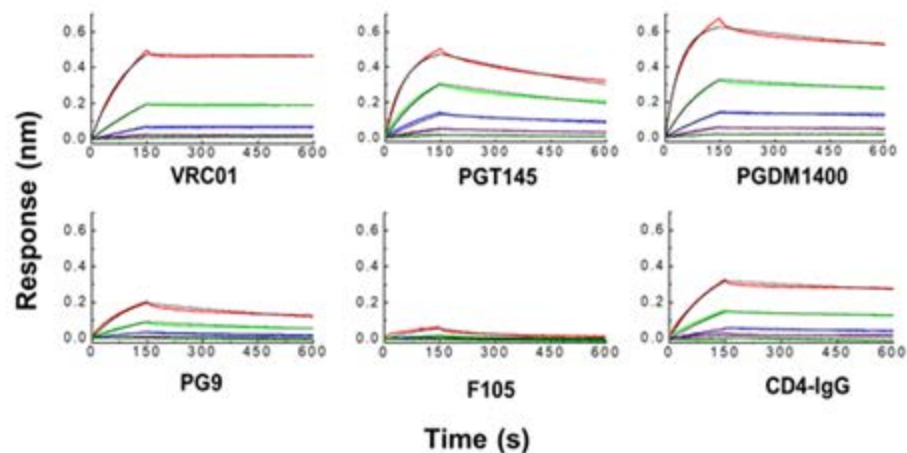

| mAbs     | $K_D$                        | $K_{on}$                   | $K_{off}$                    |
|----------|------------------------------|----------------------------|------------------------------|
| VRC01    | $1.7 \pm 0.7 \times 10^{-9}$ | $5.3 \pm 0.8 \times 10^4$  | $0.9 \pm 0.4 \times 10^{-5}$ |
| PGT145   | $1.4 \pm 0.4 \times 10^{-8}$ | $8.4 \pm 1.0 \times 10^4$  | $1.2 \pm 0.2 \times 10^{-3}$ |
| PGDM1400 | $2.9 \pm 0.5 \times 10^{-9}$ | $1.2 \pm 0 \times 10^{-5}$ | $3.6 \pm 0.5 \times 10^{-4}$ |
| PG9      | $4.1 \pm 1.2 \times 10^{-8}$ | $3.3 \pm 0.4 \times 10^4$  | $1.6 \pm 0.9 \times 10^{-3}$ |
| CD4-IgG  | $5.0 \pm 5.6 \times 10^{-8}$ | $3.4 \pm 0.3 \times 10^4$  | $3.5 \pm 0 \times 10^{-4}$   |
| F105     | No Detectable Binding        |                            |                              |

Figure 2

**A**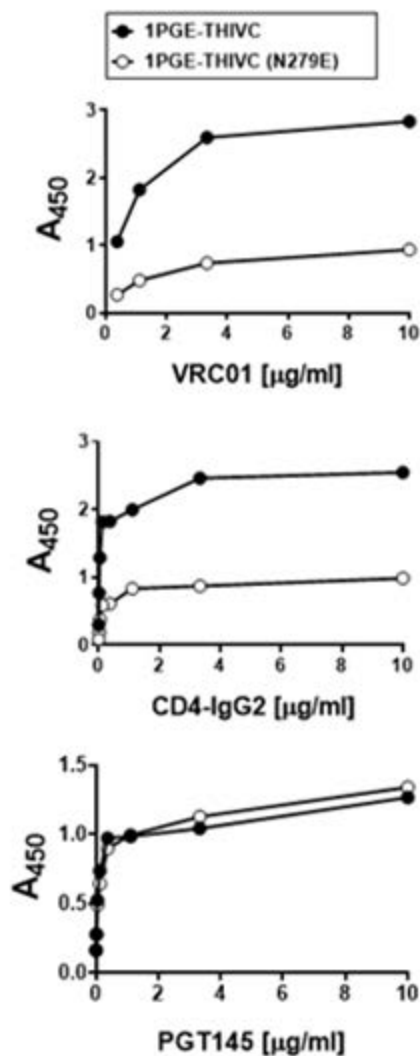**B**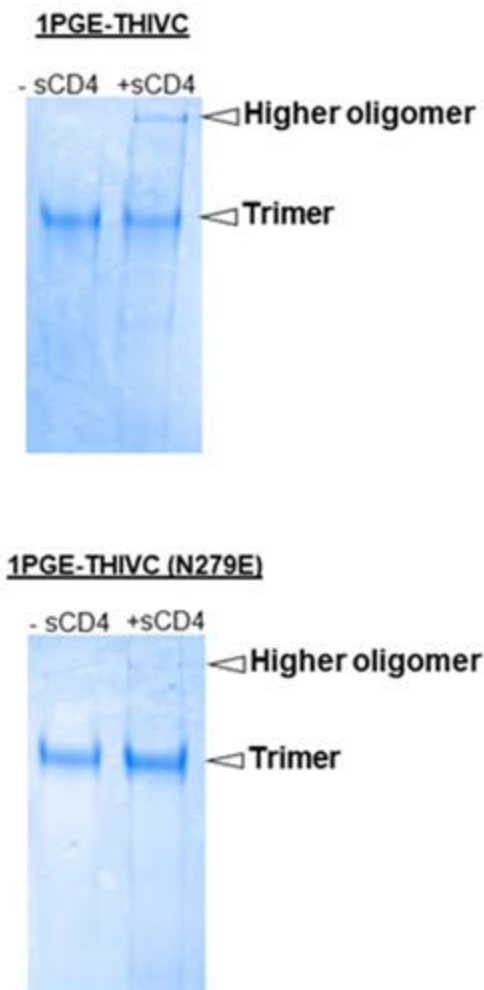**Figure 3**

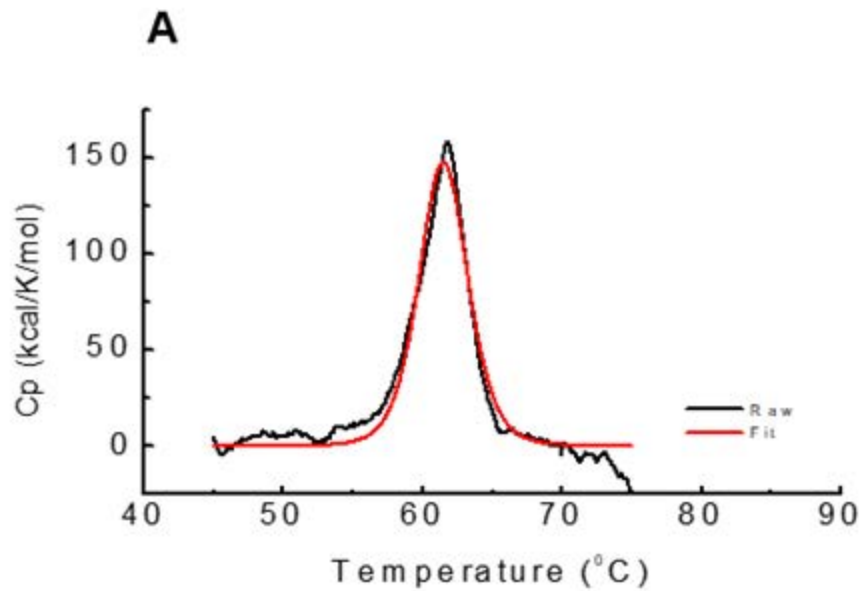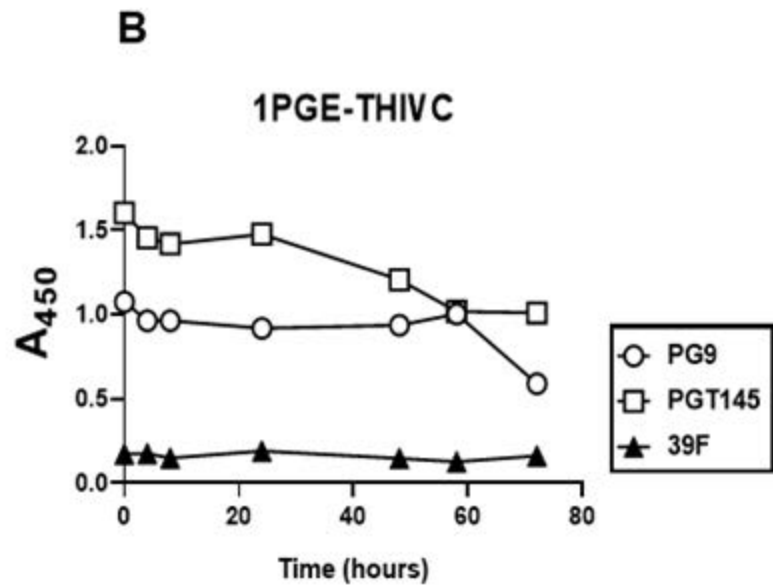

**Figure 4**

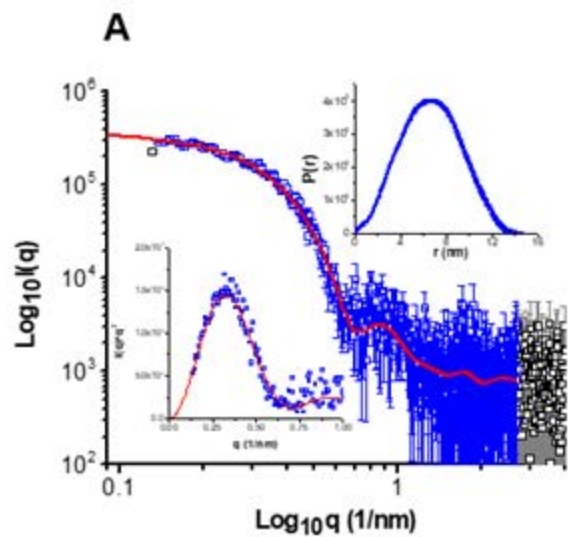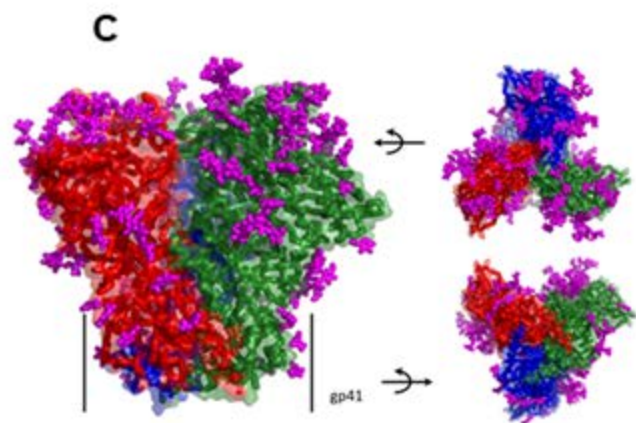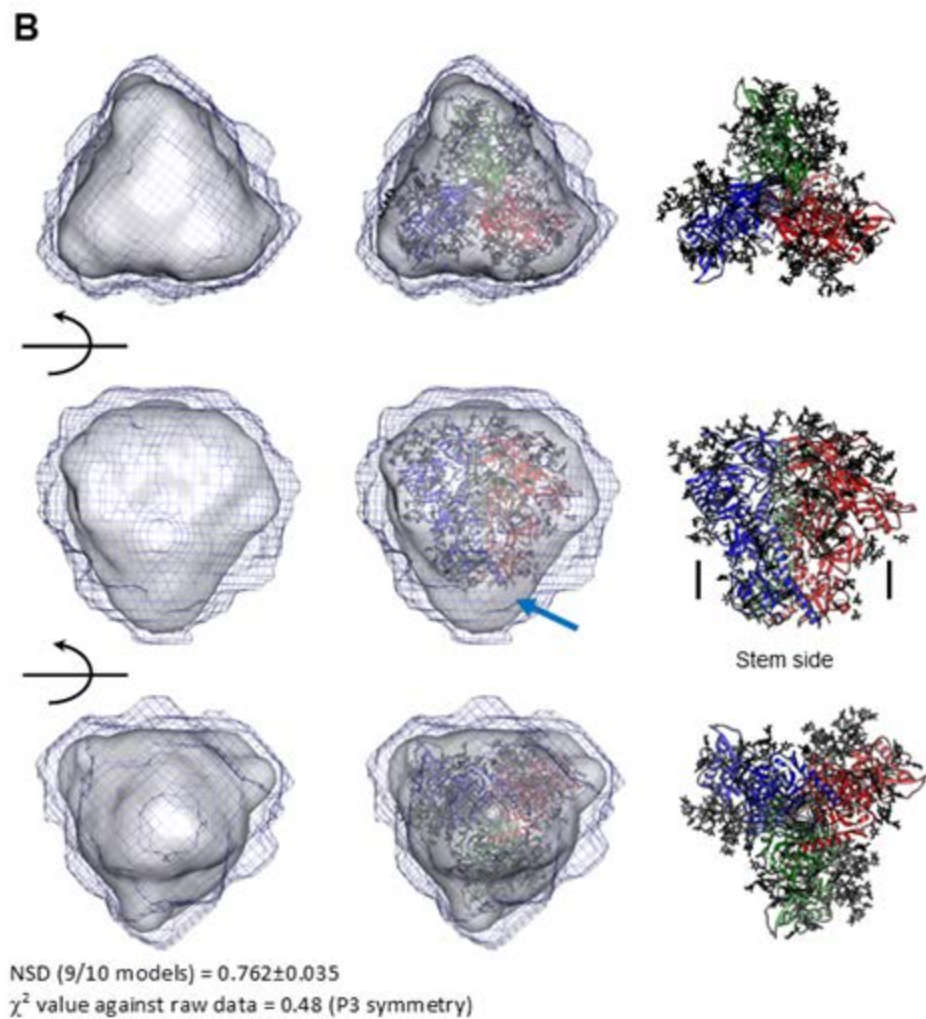

**Figure 5**

**A**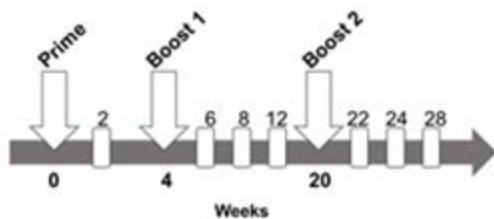**B**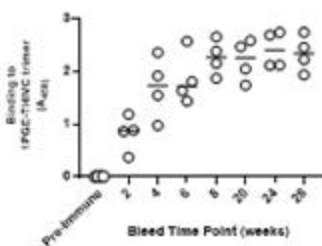**C**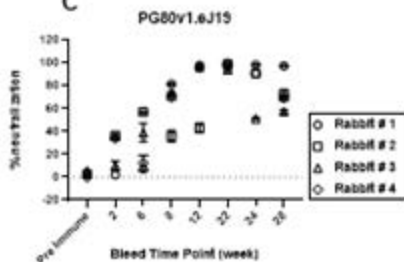**D**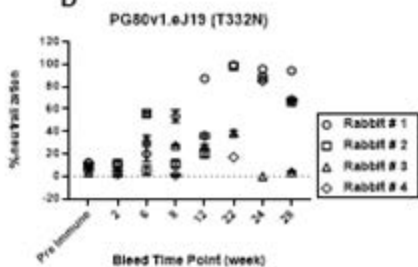**E**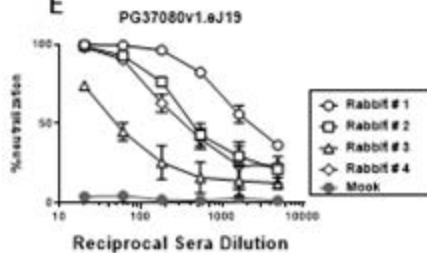**F**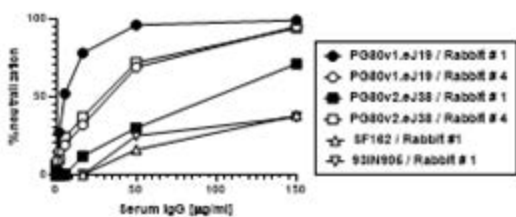**G**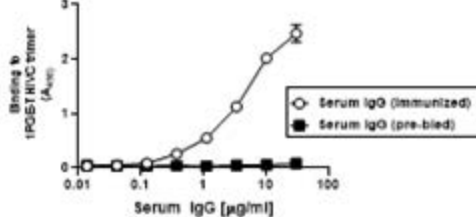**Figure 6**

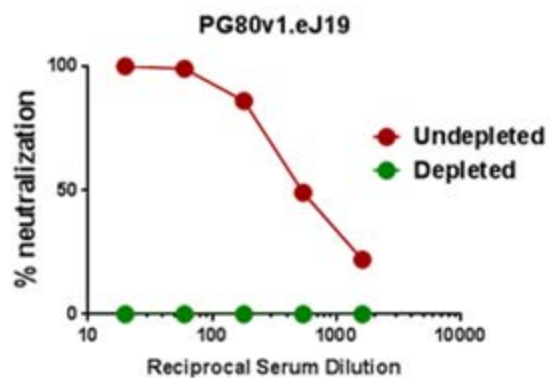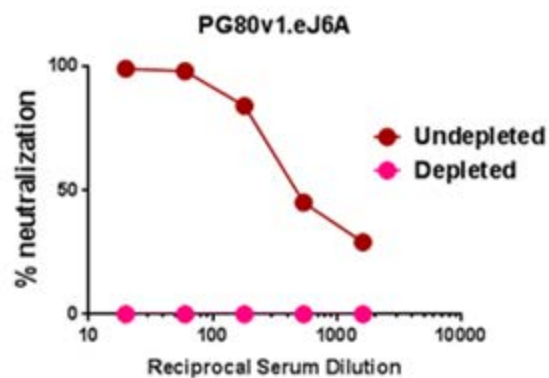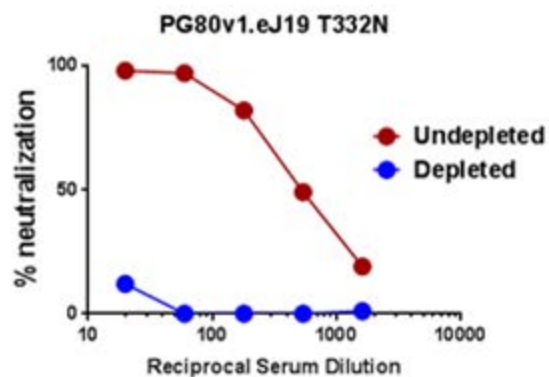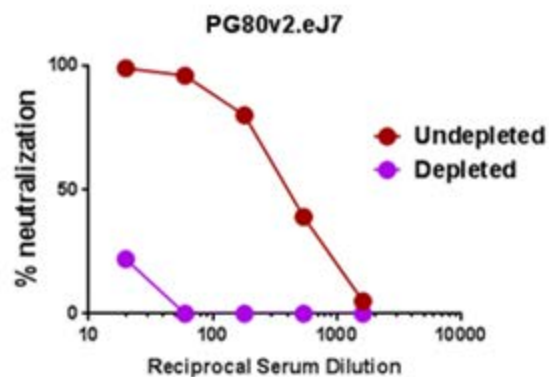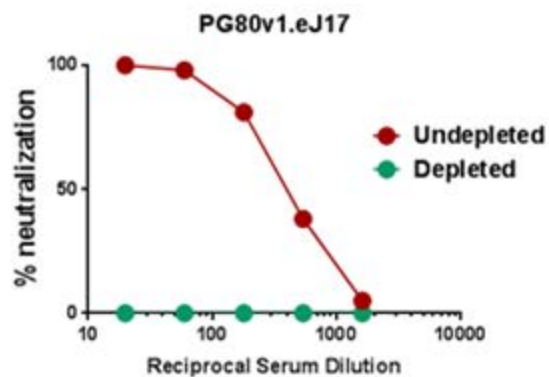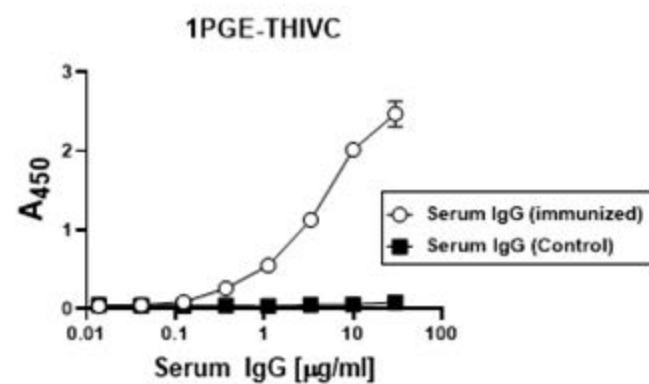

**Figure 7**



Week 6 post Boost # 1

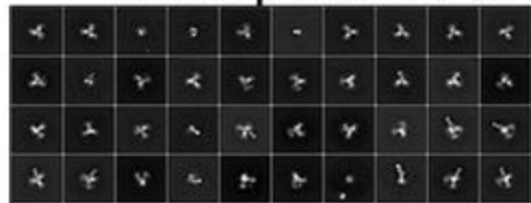

Week 12 post Boost # 1

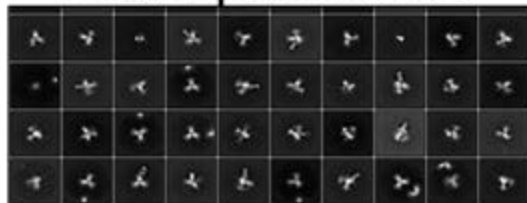

Week 22 post Boost # 2

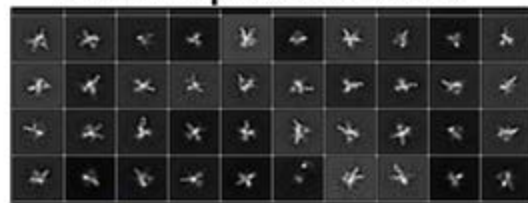

A

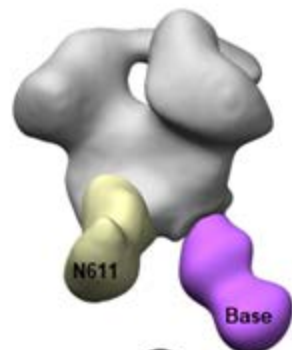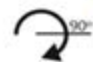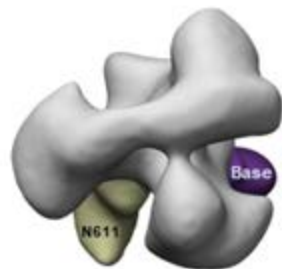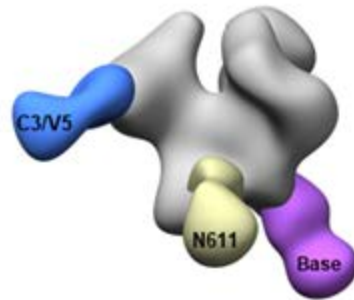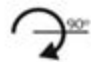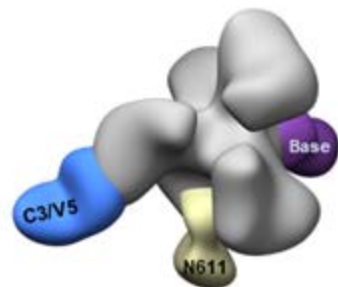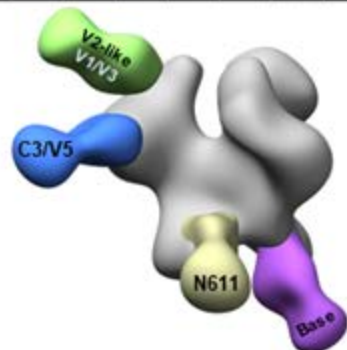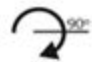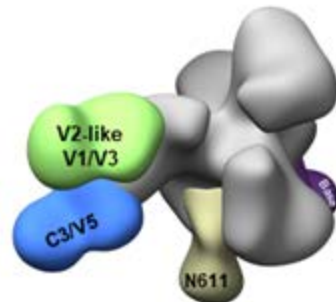

B

Figure 8

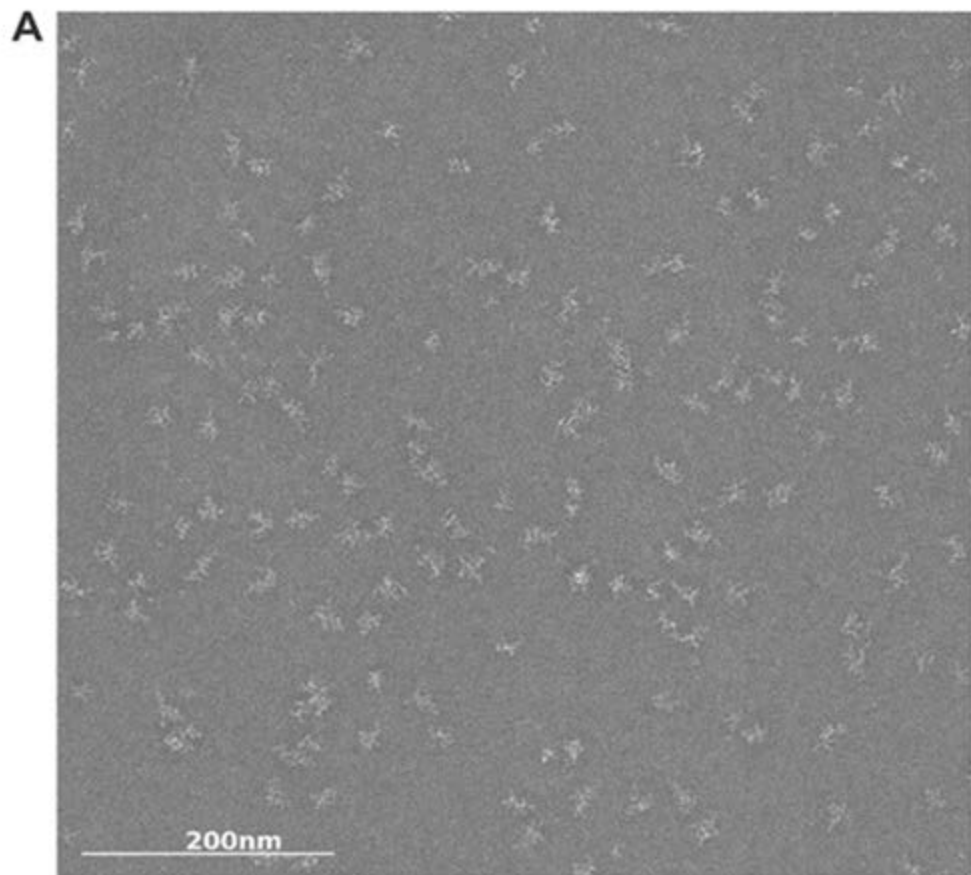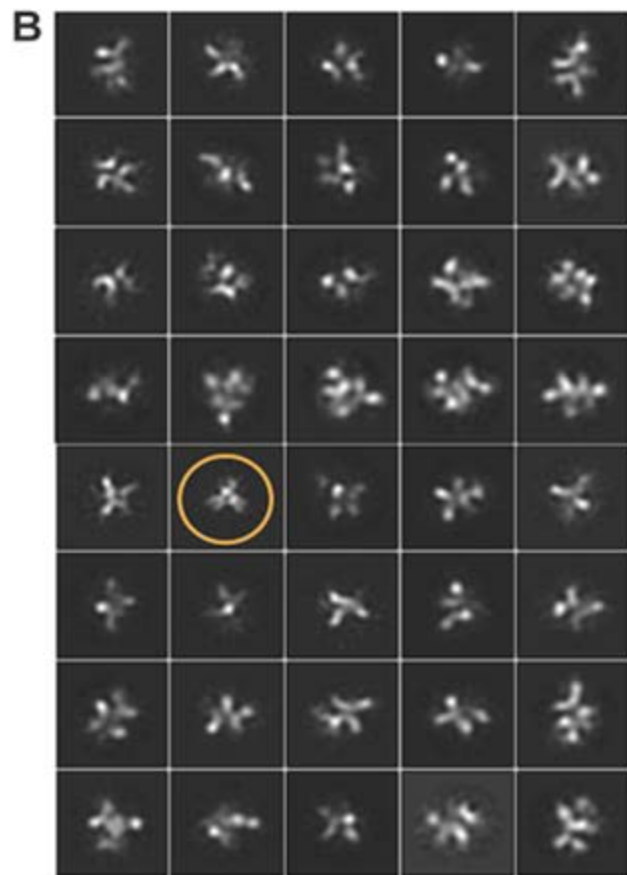

**Figure 9**
